# Supplementary material
Source: Research Square preprint supplement (doi:10.21203/rs.3.rs-9544150/v1)
Supplement: Supplementary file 1 [file 81449d0755f34bb2f2beefa1.pdf]

## Supplementary Materials

### *A Lifespan Normative Reference for Spectral Signatures of Brain Activity*

#### Supplementary Table S1: Dataset Characteristics

Overview of all datasets included in the sqEEGNorms framework, ordered by age range. For each dataset, the table reports the total number of unique participants (N), the allocation to normative training, held-out reference, and clinical cohorts, demographic characteristics (age range, mean age with standard deviation, percentage female), EEG acquisition parameters (system, channel count, sampling frequency, power line frequency), resting-state conditions (EC = eyes closed; EO = eyes open), data access repository, and the diagnostic groups represented with per-group sample sizes. All datasets were sourced from OpenNeuro. Ch. = number of EEG channels; SF = sampling frequency; PL = power line frequency; ADHD = attention-deficit/hyperactivity disorder; ASD = autism spectrum disorder; PTSD = post-traumatic stress disorder; FTD = frontotemporal dementia; MDD = major depressive disorder; SLD = specific learning disorder.

| Site | Dataset ID | Institution                       | EEG System                 | N    | Train | Held-out | Clinical | Age Range | Age (M ± SD) | % F | Ch.   | SF (Hz) | PL (Hz) | Eyes   | DOI                         | Diagnostic Groups (n)                                                                                                        |
|------|------------|-----------------------------------|----------------------------|------|-------|----------|----------|-----------|--------------|-----|-------|---------|---------|--------|-----------------------------|------------------------------------------------------------------------------------------------------------------------------|
| A    | ds004577   | Univ. Nacional Autónoma de México | Neuronic Medicid 3-E       | 103  | 93    | 10       | 0        | 1         | 1.0 ± 0.0    | 40  | 19–24 | 200     | 60      | EC, EO | 10.18112/openneuro.ds004577 | Control (103)                                                                                                                |
| B    | ds004186   | Univ. of California, San Diego    | EGI                        | 2755 | 475   | 288      | 1992     | 5–22      | 10.3 ± 3.5   | 64  | 129   | 500     | 60      | EC, EO | 10.18112/openneuro.ds004186 | Control (233), No diagnosis (530), ADHD (1034), ASD (174), Anxiety (272), PTSD (35), Depression (90), SLD (167), Other (220) |
| C    | ds003944   | Univ. of Pittsburgh               | Elekta Neuromag Vectorview | 82   | 29    | 3        | 50       | 13–36     | 22.1 ± 4.6   | 34  | 61    | 1000    | 60      | EC, EO | 10.18112/openneuro.ds003944 | Control (32)                                                                                                                 |



**Note:** ds003944 and ds003947 originate from the same institution (University of Pittsburgh) using the same acquisition system, although independent studies with non-overlapping participants. ds004186 contains the largest and most diagnostically diverse cohort, contributing the majority of clinical participants. The “Other” category for ds004186 includes communication disorder, disruptive/impulse-control disorders, intellectual disability, obsessive-compulsive disorders, motor disorders, elimination disorders, bipolar disorder, schizophrenia, eating disorders, neurocognitive disorders, and other conditions. Datasets with 0 clinical participants contributed exclusively to the normative reference (training and held-out cohorts). The Pre-QC Total row reflects participant counts at the dataset-allocation stage, before subject-level quality control. Final post-QC counts used for analysis (1,891 training recordings from 1,427 individuals; 678 held-out recordings from 400 individuals) are reported in Supplementary Table S2a. ds003490 (University of New Mexico) was excluded during quality control before training and contributed no participants to the analyses reported in the main text or in Tables S2–S13.

## 1 **Supplementary Note S1: Diagnostic criteria across contributing datasets**

2 Diagnostic labels listed in Table S1 were taken directly from each study's participants.tsv file. The original procedures used  
3 to assign those labels are summarised below for transparency. As described in the Table S1 note, only participants explicitly  
4 flagged as healthy / control / no-diagnosis (or whose participants.tsv entry indicated that no diagnostic assessment was  
5 performed) contributed to the normative reference; all other participants were assigned to the Clinical column. Of the  
6 diagnostic labels below, only those from ds004186 (HBN) and ds004504 (Ioannina) were carried forward into the diagnostic  
7 analyses reported in the main text.

8 *ds004186 (Healthy Brain Network, Child Mind Institute; UCSD acquisition site)*. All participants were administered the  
9 computerised Schedule for Affective Disorders and Schizophrenia for School-Age Children (KSADS-COMP), a semi-  
10 structured DSM-5-based psychiatric interview administered by a licensed clinician through parent and child interviews.  
11 Clinically synthesised consensus DSM-5 diagnoses were generated by the clinical team after review of the interview output  
12 and supplemental targeted assessments where indicated (e.g., the Autism Diagnostic Observation Schedule [ADOS] for  
13 suspected autism, the Clinical Evaluation of Language Fundamentals [CELF] for suspected language disorder). The HBN  
14 clinician-consensus diagnosis ("Diagnosis\_ClinicianConsensus" field) was the basis for the ADHD, ASD, anxiety, PTSD,  
15 depression, SLD, and "Other" labels reported in Table S1; participants with "No Diagnosis Given" were assigned to the no-  
16 diagnosis reference.

17 *ds004504 (University of Ioannina; AHEPA General University Hospital, Thessaloniki)*. Diagnoses of Alzheimer's disease and  
18 frontotemporal dementia were established by experienced neurologists. Per the data descriptor (Miltiadous et al., 2023),  
19 diagnoses were made according to the DSM-III-R / DSM-IV and ICD-10 criteria, with Alzheimer's disease additionally  
20 assessed against the NINCDS-ADRDA criteria. Cognitive status was characterised using the Mini-Mental State Examination  
21 (MMSE; mean  $17.75 \pm 4.5$  for AD;  $22.17 \pm 8.22$  for FTD; 30 for controls). No dementia-related comorbidities were reported.

22 *ds003478 (University of Arizona)*. Per the source data descriptor (Cavanagh, 2021), college-age participants were stratified  
23 using the Beck Depression Inventory (BDI). The participants.tsv labels distinguish controls (stable BDI < 7, no Axis I  
24 symptoms) from depressed participants (BDI  $\geq 13$  with corroborating clinical features). Only participants flagged as controls  
25 in participants.tsv were used in the normative reference; depressed participants are counted in the Clinical column of Table S1  
26 but were not analysed as a separate diagnostic cohort in the main text.

27 *ds003944 / ds003947 (University of Pittsburgh)*. In the source datasets (Salisbury, Seebold & Coffman, 2022), the clinical  
28 cohort comprised first-episode psychosis (FEP) participants, with the participants.tsv file separating FEP from healthy  
29 controls. Only participants flagged as controls in participants.tsv were used in the normative reference; FEP participants are  
30 counted in the Clinical column but were not analysed as a separate diagnostic cohort in the main text.

31 *ds003490 (University of New Mexico)*. Per the source data descriptor (Cavanagh, Singh & Narayanan, 2021), the cohort  
32 comprised Parkinson's disease patients (recorded ON and OFF dopaminergic medication, with accelerometry of the most-  
33 affected hand) and matched controls. This dataset was excluded in its entirety during quality control prior to model training;  
34 neither controls nor PD participants contributed to any reported analysis.

## 35 **Supplementary Table S2: Dataset Split and Diagnostic Cohort** 36 **Demographics**

37 **Supplementary Table S2a.** Recordings are defined as unique subject  $\times$  resting-state condition (eyes-closed or eyes-open)  
38 combinations, restricted to the first run of the first session of each study and retained after preprocessing and quality control  
39 (see Methods).

| Cohort                     | Recordings | Individuals | Age Range | % Female |
|----------------------------|------------|-------------|-----------|----------|
| Training (reference)       | 1891       | 1427        | 1–82      | 64%      |
| Held-out (reference)       | 678        | 400         | 1–70      | 64%      |
| Testing (multi-diagnostic) | 3033       | 2146        | 5–79      | 63%      |
| Total                      | 5602       | 3973        | 1–82      | 63%      |

40

41

**Supplementary Table S2b.** Diagnostic cohorts in the testing set (six cohorts analyzed in the main text).

| Diagnosis           | N individuals | N recordings | Age Range | Age (M ± SD) | % Female | EC / EO     | Site                |
|---------------------|---------------|--------------|-----------|--------------|----------|-------------|---------------------|
| ADHD                | 1034          | 2032         | 5–22      | 10.4 ± 3.5   | 65.4%    | 1028 / 1004 | UCSD (EGI)          |
| Anxiety             | 272           | 530          | 5–22      | 10.3 ± 3.4   | 59.9%    | 269 / 261   | UCSD (EGI)          |
| ASD                 | 174           | 343          | 5–22      | 10.8 ± 3.8   | 63.2%    | 174 / 169   | UCSD (EGI)          |
| Alzheimer's disease | 36            | 36           | 49–79     | 66.4 ± 7.9   | 66.7%    | 36 / 0      | Ioannina (EEG 2100) |
| PTSD                | 35            | 70           | 5–21      | 10.8 ± 3.9   | 77.1%    | 35 / 35     | UCSD (EGI)          |
| FTD                 | 22            | 22           | 44–78     | 63.7 ± 8.4   | 40.9%    | 22 / 0      | Ioannina (EEG 2100) |

42

43

**Supplementary Table S3: Model Validation Metrics**

44

45

46

47

**Supplementary Table S3.** Aggregate model performance across 231 feature-region models. Values summarize distributions across models. Training set: n = 1,427 subjects (1,891 recordings); held-out test set: n = 400 subjects (678 recordings). Per-feature training row counts ranged from 1,762 to 1,891 due to regional electrode coverage variation across acquisition montages.

| Metric         | Train Mean | Train Median | Test Mean | Test Median | [Gap] Mean | Gap IQR |
|----------------|------------|--------------|-----------|-------------|------------|---------|
| Z-score Mean   | 0.002      | -0.001       | 0.006     | 0.019       | 0.052      | 0.104   |
| Z-score SD     | 1.002      | 1.001        | 1.042     | 1.047       | 0.052      | 0.060   |
| Skewness       | -0.001     | -0.003       | 0.023     | 0.036       | 0.146      | 0.236   |
| Kurtosis       | -0.025     | -0.020       | 0.394     | 0.404       | 0.465      | 0.540   |
| R <sup>2</sup> | 0.341      | 0.374        | 0.281     | 0.309       | 0.095      | 0.192   |
| RMSE           | 0.957      | 0.650        | 0.937     | 0.613       | 0.084      | 0.723   |
| MSE            | 1.933      | 0.423        | 1.888     | 0.376       | 0.325      | 0.822   |

48

49 **Supplementary Table S4: ICA vs. Non-ICA Pipeline Comparison**

50 **Supplementary Table S4.** Comparison of model performance between base and ICA-augmented preprocessing. Cohen's d  
 51 and practical significance alongside FDR-corrected p-values. Only R<sup>2</sup> showed significance (d = 0.54, q < 0.001); ICA improved  
 52 explained variance but had negligible effect on all other metrics including z-score calibration.

| Metric                   | No-ICA Mean | ICA Mean  | $\Delta$ Mean | Cohen's d | Effect     | q (FDR) | Sig.  |
|--------------------------|-------------|-----------|---------------|-----------|------------|---------|-------|
| MSE                      | 1.8879      | 1.7910    | -0.0969       | -0.0290   | Negligible | 0.8962  | False |
| Mean_Error               | 0.0440      | 0.0395    | -0.0045       | -0.0397   | Negligible | 0.8962  | False |
| RMSE                     | 0.9371      | 0.9129    | -0.0241       | -0.0243   | Negligible | 0.8962  | False |
| R_Squared                | 0.2811      | 0.3656    | 0.0845        | 0.5399    | Medium     | 0.0000  | True  |
| Z_Scores_Mean            | 0.0059      | 0.0037    | -0.0022       | -0.0363   | Negligible | 0.8962  | False |
| Z_Scores_SD              | 1.0424      | 1.0412    | -0.0012       | -0.0267   | Negligible | 0.8962  | False |
| Kurtosis                 | 0.3944      | 0.3077    | -0.0867       | -0.2337   | Small      | 0.1195  | False |
| Normality_Test_Statistic | 0.9947      | 0.9950    | 0.0003        | 0.0944    | Negligible | 0.8962  | False |
| Skewness                 | 0.0232      | 0.0213    | -0.0019       | -0.0110   | Negligible | 0.9088  | False |
| AIC                      | 2104.3432   | 2012.1484 | -92.1948      | -0.0175   | Negligible | 0.8962  | False |
| BIC                      | 2299.6512   | 2208.4558 | -91.1954      | -0.0173   | Negligible | 0.8962  | False |
| Logarithmic_Score        | -0.5429     | -0.5338   | 0.0091        | 0.0061    | Negligible | 0.9088  | False |

53

54 **Supplementary Table S5: Trajectory Comparison Summary**

55 **Supplementary Table S5.** Summary of trajectory-level statistical comparisons. Circular-shift permutation testing (2,000  
 56 permutations) on the absolute-area statistic, FDR-corrected.

| Analysis           | N significant | N total | % significant | Min q | Mean q |
|--------------------|---------------|---------|---------------|-------|--------|
| Sex q50 shape      | 0             | 143     | 0.0%          | 0.55  | 0.98   |
| Sex q50 level      | 33            | 143     | 23.1%         | 0.003 | 0.59   |
| Sex $\sigma$ shape | 0             | 143     | 0.0%          | 0.58  | 0.96   |
| Lateralization q50 | 0             | 104     | 0.0%          | 1.0   | 0.94   |

57

58 Full per-feature results are provided as supplementary CSV files: sex\_effects\_table.csv, lateralization\_table.csv,  
 59 topology\_table.csv.

60 **Supplementary Table S5b: Regional Normative Trajectory Summaries**

61 **Supplementary Tables S5b.1–S5b.5.** Qualitative summary of normative spectral trajectories per cortical region. For each  
 62 frequency band, the table reports sex differences in relative power spectral density (f/m  $\Delta$ rPSD), trajectory shape similarity  
 63 between sexes (f/m trend), variance characteristics across the lifespan, and the general trend direction. Regions: LF = Left  
 64 Frontal, MF = Median Frontal, RF = Right Frontal, LT = Left Temporal, RT = Right Temporal, LP = Left Parietal, MP =  
 65 Median Parietal, RP = Right Parietal, LO = Left Occipital, RO = Right Occipital, MO = Median Occipital. "=" indicates the  
 66 pattern is equivalent to the reference region listed.

67

68 **S5b –  $\delta$  band:** Delta ( $\delta$ ) rPSD normative trends

| Region | f/m $\Delta$ rPSD | f/m trend | general variance | general trend                         |
|--------|-------------------|-----------|------------------|---------------------------------------|
| LF     | No                | =         | Constant         | Decrease. Constant from 20-25         |
| MF     | No                | =         | = LF             | = LF                                  |
| RF     | No                | =         | = LF             | = LF                                  |
| LT     | No                | =         | Constant         | Decrease. Plateau 25-50. Decrease >50 |
| RT     | No                | =         | = LT             | = LT                                  |
| LP     | No                | =         | = LT             | Decrease. Constant from 20-25         |

|    |    |   |          |                               |
|----|----|---|----------|-------------------------------|
| MP | No | = | = LP     | = LP                          |
| RP | No | = | = LP     | = LP                          |
| LO | No | = | Constant | Decrease. Constant from 20-25 |
| RO | No | = | = LO     | = LO                          |
| MO | No | = | = LO     | = LO                          |

69

70 **S5b –  $\theta$  band: Theta ( $\theta$ ) rPSD normative trends**

| Region | f/m $\Delta$ rPSD | f/m trend | general variance              | general trend                         |
|--------|-------------------|-----------|-------------------------------|---------------------------------------|
| LF     | No                | =         | Constant                      | Decrease                              |
| MF     | No                | =         | = LF                          | = LF                                  |
| RF     | No                | =         | = LF                          | = LF                                  |
| LT     | No                | =         | Constant                      | Decrease                              |
| RT     | No                | =         | Constant                      | = LT                                  |
| LP     | No                | =         | Decrease. Constant from 15-20 | Decrease. Plateau 20-40. Decrease >40 |
| MP     | No                | =         | = LP                          | = LP                                  |
| RP     | No                | =         | = LP                          | = LP                                  |
| LO     | No                | =         | Decrease. Constant from 15-20 | Decrease. Constant from 15-20         |
| RO     | No                | =         | = LO                          | = LO                                  |
| MO     | No                | =         | = LO                          | = LO                                  |

71

72 **S5b –  $\alpha$  + PAF band: Alpha ( $\alpha$ ) rPSD and PAF normative trends**

| Region | f/m $\Delta$ rPSD | f/m trend | general variance           | general trend                                             | PAF trend                              | PAF variance |
|--------|-------------------|-----------|----------------------------|-----------------------------------------------------------|----------------------------------------|--------------|
| LF     | No                | =         | Increase. Constant from 30 | Increase. Peak + plateaus at 20-40. Slow decrease from 40 | Increase. Peak at 20-30. Slow decrease | Constant     |
| MF     | No                | =         | = LF                       | = LF                                                      | = LF                                   | = LF         |
| RF     | No                | =         | = LF                       | = LF                                                      | = LF                                   | = LF         |
| LT     | No                | =         | Increase. Constant from 30 | Increase. Peak + plateaus at 20-40. Slow decrease from 40 | Increase. Peak at 20-30. Slow decrease | Constant     |
| RT     | No                | =         | = LT                       | = LT                                                      | = LT                                   | = LT         |
| LP     | No                | =         | Increase. Constant from 30 | Increase. Peak + plateaus at 20-40. Slow decrease from 40 | Increase. Peak at 20-30. Slow decrease | Constant     |
| MP     | No                | =         | = LP                       | = LP                                                      | = LP                                   | = LP         |
| RP     | No                | =         | = LP                       | = LP                                                      | = LP                                   | = LP         |
| LO     | No                | =         | Increase. Constant from 30 | Increase. Peak + plateaus at 20-40. Slow decrease from 40 | Increase. Peak at 20-30. Slow decrease | Constant     |
| RO     | No                | =         | = LO                       | = LO                                                      | = LO                                   | = LO         |
| MO     | No                | =         | = LO                       | = LO                                                      | = LO                                   | = LO         |

73

74 **S5b –  $\beta$  band: Beta ( $\beta$ ) rPSD normative trends**

| Region | f/m $\Delta$ rPSD | f/m trend | general variance | general trend           |
|--------|-------------------|-----------|------------------|-------------------------|
| LF     | No                | =         | Increase         | Increase (slower 20-30) |
| MF     | No                | =         | = LF             | Increase                |

|    |    |   |                           |                           |
|----|----|---|---------------------------|---------------------------|
| RF | No | = | = LF                      | = LF                      |
| LT | No | = | Increase                  | Increase (slower from 20) |
| RT | No | = | = LT                      | = LT                      |
| LP | No | = | Increase                  | Increase (slower from 20) |
| MP | No | = | = LP                      | = LP                      |
| RP | No | = | = LP                      | = LP                      |
| LO | No | = | Increase (slower from 20) | Increase (slower from 20) |
| RO | No | = | = LO                      | = LO                      |
| MO | No | = | = LO                      | = LO                      |

75

76 **S5b –  $\gamma$  band: Gamma ( $\gamma$ ) rPSD normative trends**

| Region | f/m $\Delta$ rPSD | f/m trend | general variance                                                | general trend           |
|--------|-------------------|-----------|-----------------------------------------------------------------|-------------------------|
| LF     | No                | =         | Increase. Plateau 20-50                                         | Increase                |
| MF     | No                | =         | Increase (slower from 20)                                       | = LF                    |
| RF     | No                | =         | Monotonic increase                                              | = LF                    |
| LT     | No                | =         | Increase (1-5). Constant (5-15). Increase (15-20). Constant >20 | Increase                |
| RT     | No                | =         | = LT                                                            | = LT                    |
| LP     | No                | =         | Increase                                                        | Increase                |
| MP     | No                | =         | Increase. Plateau 5-15                                          | Increase. Plateau 20-30 |
| RP     | No                | =         | = LP                                                            | = LP                    |
| LO     | No                | =         | Increase. Plateau 20-30                                         | Increase. Plateau 20-30 |
| RO     | No                | =         | = LO                                                            | = LO                    |
| MO     | No                | =         | = LO                                                            | = LO                    |

77

**Supplementary Table S6: Full Univariate Deviation Results**

Supplementary Table S6a. Diagnosis vs. reference comparisons. Mann-Whitney U with rank-biserial r; BH-FDR corrected.

| Diagnosis | Feature         | N diag | N ref | r      | q (FDR)  | Sig. |
|-----------|-----------------|--------|-------|--------|----------|------|
| ADHD      | 1/f int.        | 1034   | 400   | 0.123  | 0.001    | **   |
| ADHD      | 1/f slope       | 1034   | 400   | -0.014 | 0.763    | n.s. |
| ADHD      | F/S             | 1034   | 400   | 0.149  | 6.00e-05 | ***  |
| ADHD      | PAF             | 1034   | 400   | -0.021 | 0.638    | n.s. |
| ADHD      | $\alpha$ [dB]   | 1034   | 400   | 0.176  | 1.66e-06 | ***  |
| ADHD      | $\beta$ [dB]    | 1034   | 400   | 0.071  | 0.066    | n.s. |
| ADHD      | $\gamma$ [dB]   | 1034   | 400   | 0.031  | 0.459    | n.s. |
| ADHD      | $\delta$ [dB]   | 1034   | 400   | -0.147 | 7.43e-05 | ***  |
| ADHD      | $\theta$ [dB]   | 1034   | 400   | 0.138  | 1.98e-04 | ***  |
| ADHD      | $\theta/\alpha$ | 1034   | 400   | -0.120 | 0.001    | **   |
| ADHD      | $\theta/\beta$  | 1034   | 400   | 0.033  | 0.445    | n.s. |
| ASD       | 1/f int.        | 174    | 400   | 0.072  | 0.248    | n.s. |
| ASD       | 1/f slope       | 174    | 400   | -0.076 | 0.227    | n.s. |
| ASD       | F/S             | 174    | 400   | 0.153  | 0.009    | **   |
| ASD       | PAF             | 174    | 400   | -0.090 | 0.152    | n.s. |
| ASD       | $\alpha$ [dB]   | 174    | 400   | 0.155  | 0.008    | **   |
| ASD       | $\beta$ [dB]    | 174    | 400   | 0.115  | 0.056    | n.s. |
| ASD       | $\gamma$ [dB]   | 174    | 400   | 0.135  | 0.022    | *    |
| ASD       | $\delta$ [dB]   | 174    | 400   | -0.168 | 0.004    | **   |
| ASD       | $\theta$ [dB]   | 174    | 400   | 0.209  | 2.41e-04 | ***  |
| ASD       | $\theta/\alpha$ | 174    | 400   | -0.074 | 0.235    | n.s. |
| ASD       | $\theta/\beta$  | 174    | 400   | 0.026  | 0.706    | n.s. |
| Alzheimer | 1/f int.        | 36     | 400   | 0.574  | 1.07e-07 | ***  |
| Alzheimer | 1/f slope       | 36     | 400   | 0.348  | 0.002    | **   |
| Alzheimer | F/S             | 36     | 400   | -0.686 | 3.10e-10 | ***  |
| Alzheimer | PAF             | 36     | 400   | -0.284 | 0.011    | *    |
| Alzheimer | $\alpha$ [dB]   | 36     | 400   | -0.664 | 7.87e-10 | ***  |
| Alzheimer | $\beta$ [dB]    | 36     | 400   | -0.597 | 3.24e-08 | ***  |
| Alzheimer | $\gamma$ [dB]   | 36     | 400   | 0.219  | 0.057    | n.s. |
| Alzheimer | $\delta$ [dB]   | 36     | 400   | 0.442  | 5.98e-05 | ***  |
| Alzheimer | $\theta$ [dB]   | 36     | 400   | 0.650  | 1.39e-09 | ***  |
| Alzheimer | $\theta/\alpha$ | 36     | 400   | 0.787  | 3.39e-13 | ***  |
| Alzheimer | $\theta/\beta$  | 36     | 400   | 0.662  | 7.87e-10 | ***  |
| Anxiety   | 1/f int.        | 272    | 400   | 0.145  | 0.004    | **   |
| Anxiety   | 1/f slope       | 272    | 400   | 0.004  | 0.961    | n.s. |
| Anxiety   | F/S             | 272    | 400   | 0.106  | 0.041    | *    |
| Anxiety   | PAF             | 272    | 400   | -0.033 | 0.571    | n.s. |
| Anxiety   | $\alpha$ [dB]   | 272    | 400   | 0.122  | 0.017    | *    |
| Anxiety   | $\beta$ [dB]    | 272    | 400   | 0.045  | 0.434    | n.s. |
| Anxiety   | $\gamma$ [dB]   | 272    | 400   | 0.025  | 0.683    | n.s. |
| Anxiety   | $\delta$ [dB]   | 272    | 400   | -0.074 | 0.175    | n.s. |
| Anxiety   | $\theta$ [dB]   | 272    | 400   | 0.059  | 0.279    | n.s. |
| Anxiety   | $\theta/\alpha$ | 272    | 400   | -0.096 | 0.064    | n.s. |
| Anxiety   | $\theta/\beta$  | 272    | 400   | 0.014  | 0.813    | n.s. |
| FTD       | 1/f int.        | 22     | 400   | 0.413  | 0.003    | **   |
| FTD       | 1/f slope       | 22     | 400   | 0.143  | 0.362    | n.s. |
| FTD       | F/S             | 22     | 400   | -0.588 | 2.07e-05 | ***  |
| FTD       | PAF             | 22     | 400   | 0.050  | 0.763    | n.s. |

|      |                 |    |     |        |          |      |
|------|-----------------|----|-----|--------|----------|------|
| FTD  | $\alpha$ [dB]   | 22 | 400 | -0.518 | 1.86e-04 | ***  |
| FTD  | $\beta$ [dB]    | 22 | 400 | -0.378 | 0.007    | **   |
| FTD  | $\gamma$ [dB]   | 22 | 400 | 0.095  | 0.568    | n.s. |
| FTD  | $\delta$ [dB]   | 22 | 400 | 0.331  | 0.020    | *    |
| FTD  | $\theta$ [dB]   | 22 | 400 | 0.603  | 1.24e-05 | ***  |
| FTD  | $\theta/\alpha$ | 22 | 400 | 0.718  | 1.16e-07 | ***  |
| FTD  | $\theta/\beta$  | 22 | 400 | 0.513  | 1.98e-04 | ***  |
| PTSD | 1/f int.        | 35 | 400 | 0.159  | 0.190    | n.s. |
| PTSD | 1/f slope       | 35 | 400 | -0.015 | 0.938    | n.s. |
| PTSD | F/S             | 35 | 400 | 0.054  | 0.690    | n.s. |
| PTSD | PAF             | 35 | 400 | -0.214 | 0.066    | n.s. |
| PTSD | $\alpha$ [dB]   | 35 | 400 | 0.076  | 0.568    | n.s. |
| PTSD | $\beta$ [dB]    | 35 | 400 | -0.013 | 0.944    | n.s. |
| PTSD | $\gamma$ [dB]   | 35 | 400 | -0.001 | 0.990    | n.s. |
| PTSD | $\delta$ [dB]   | 35 | 400 | -0.103 | 0.430    | n.s. |
| PTSD | $\theta$ [dB]   | 35 | 400 | 0.157  | 0.194    | n.s. |
| PTSD | $\theta/\alpha$ | 35 | 400 | 0.007  | 0.961    | n.s. |
| PTSD | $\theta/\beta$  | 35 | 400 | 0.160  | 0.190    | n.s. |

80

81

Supplementary Table S6b. Within-category pairwise comparisons.

| Group 1   | Group 2 | Feature         | N <sub>1</sub> | N <sub>2</sub> | r      | q (FDR) | Sig. |
|-----------|---------|-----------------|----------------|----------------|--------|---------|------|
| ADHD      | ASD     | 1/f int.        | 1034           | 174            | 0.060  | 0.490   | n.s. |
| ADHD      | ASD     | 1/f slope       | 1034           | 174            | 0.075  | 0.366   | n.s. |
| ADHD      | ASD     | F/S             | 1034           | 174            | -0.019 | 0.867   | n.s. |
| ADHD      | ASD     | PAF             | 1034           | 174            | 0.077  | 0.366   | n.s. |
| ADHD      | ASD     | $\alpha$ [dB]   | 1034           | 174            | 0.013  | 0.869   | n.s. |
| ADHD      | ASD     | $\beta$ [dB]    | 1034           | 174            | -0.066 | 0.417   | n.s. |
| ADHD      | ASD     | $\gamma$ [dB]   | 1034           | 174            | -0.124 | 0.294   | n.s. |
| ADHD      | ASD     | $\delta$ [dB]   | 1034           | 174            | 0.035  | 0.732   | n.s. |
| ADHD      | ASD     | $\theta$ [dB]   | 1034           | 174            | -0.103 | 0.366   | n.s. |
| ADHD      | ASD     | $\theta/\alpha$ | 1034           | 174            | -0.048 | 0.550   | n.s. |
| ADHD      | ASD     | $\theta/\beta$  | 1034           | 174            | 0.006  | 0.924   | n.s. |
| Alzheimer | FTD     | 1/f int.        | 36             | 22             | 0.098  | 0.789   | n.s. |
| Alzheimer | FTD     | 1/f slope       | 36             | 22             | 0.159  | 0.550   | n.s. |
| Alzheimer | FTD     | F/S             | 36             | 22             | -0.265 | 0.366   | n.s. |
| Alzheimer | FTD     | PAF             | 36             | 22             | -0.275 | 0.366   | n.s. |
| Alzheimer | FTD     | $\alpha$ [dB]   | 36             | 22             | -0.260 | 0.366   | n.s. |
| Alzheimer | FTD     | $\beta$ [dB]    | 36             | 22             | -0.189 | 0.512   | n.s. |
| Alzheimer | FTD     | $\gamma$ [dB]   | 36             | 22             | 0.086  | 0.813   | n.s. |
| Alzheimer | FTD     | $\delta$ [dB]   | 36             | 22             | 0.172  | 0.550   | n.s. |
| Alzheimer | FTD     | $\theta$ [dB]   | 36             | 22             | 0.245  | 0.366   | n.s. |
| Alzheimer | FTD     | $\theta/\alpha$ | 36             | 22             | 0.321  | 0.366   | n.s. |
| Alzheimer | FTD     | $\theta/\beta$  | 36             | 22             | 0.268  | 0.366   | n.s. |
| Anxiety   | PTSD    | 1/f int.        | 272            | 35             | -0.004 | 0.972   | n.s. |
| Anxiety   | PTSD    | 1/f slope       | 272            | 35             | 0.023  | 0.878   | n.s. |
| Anxiety   | PTSD    | F/S             | 272            | 35             | 0.049  | 0.838   | n.s. |
| Anxiety   | PTSD    | PAF             | 272            | 35             | 0.173  | 0.366   | n.s. |
| Anxiety   | PTSD    | $\alpha$ [dB]   | 272            | 35             | 0.039  | 0.867   | n.s. |
| Anxiety   | PTSD    | $\beta$ [dB]    | 272            | 35             | 0.062  | 0.789   | n.s. |
| Anxiety   | PTSD    | $\gamma$ [dB]   | 272            | 35             | 0.029  | 0.869   | n.s. |
| Anxiety   | PTSD    | $\delta$ [dB]   | 272            | 35             | 0.030  | 0.869   | n.s. |

|         |      |                 |     |    |        |       |      |
|---------|------|-----------------|-----|----|--------|-------|------|
| Anxiety | PTSD | $\theta$ [dB]   | 272 | 35 | -0.110 | 0.550 | n.s. |
| Anxiety | PTSD | $\theta/\alpha$ | 272 | 35 | -0.097 | 0.577 | n.s. |
| Anxiety | PTSD | $\theta/\beta$  | 272 | 35 | -0.151 | 0.399 | n.s. |

82

83 **Supplementary Table S7: Mahalanobis Distances**

84 **Supplementary Table S7a.** Diagnosis vs. reference (K=11 features).

| Diagnosis | D <sup>2</sup> Mean | D <sup>2</sup> SD | N    | K  |
|-----------|---------------------|-------------------|------|----|
| ADHD      | 2.300               | 0.725             | 1034 | 11 |
| ASD       | 2.822               | 0.931             | 174  | 11 |
| Alzheimer | 9.183               | 3.204             | 36   | 11 |
| FTD       | 7.413               | 3.874             | 22   | 11 |
| Anxiety   | 2.772               | 1.029             | 272  | 11 |
| PTSD      | 3.169               | 1.019             | 35   | 11 |

85

86 **Supplementary Table S7b.** Within-category symmetric distances.

| Comparison       | D <sup>2</sup> sym | D <sup>2</sup> (A→B) | D <sup>2</sup> (B→A) | N <sub>1</sub> | N <sub>2</sub> |
|------------------|--------------------|----------------------|----------------------|----------------|----------------|
| ADHD vs ASD      | 3.288              | 2.671                | 3.905                | 1034           | 174            |
| Alzheimer vs FTD | 4.741              | 5.611                | 3.871                | 36             | 22             |
| Anxiety vs PTSD  | 3.586              | 3.565                | 3.607                | 272            | 35             |

87

88

**Supplementary Table S8: Covariate Effects (Figure 4)**

| Diagnosis | Comparison         | r      | q (FDR)  | Sig. | Significant |
|-----------|--------------------|--------|----------|------|-------------|
| ADHD      | vs_reference       | -0.457 | 2.00e-70 | ***  | True        |
| ASD       | vs_reference       | -0.094 | 0.017    | *    | True        |
| Alzheimer | vs_reference       | 0.941  | 4.88e-21 | ***  | True        |
| FTD       | vs_reference       | 0.690  | 7.04e-08 | ***  | True        |
| Anxiety   | vs_reference       | -0.180 | 1.19e-07 | ***  | True        |
| PTSD      | vs_reference       | 0.116  | 0.111    | ns   | False       |
| Reference | sex_Male_vs_Female | 0.007  | 0.907    | ns   | False       |
| ADHD      | sex_Male_vs_Female | 0.070  | 0.444    | ns   | False       |
| ASD       | sex_Male_vs_Female | -0.036 | 0.907    | ns   | False       |
| Alzheimer | sex_Male_vs_Female | -0.319 | 0.444    | ns   | False       |
| FTD       | sex_Male_vs_Female | 0.214  | 0.796    | ns   | False       |
| Anxiety   | sex_Male_vs_Female | 0.054  | 0.796    | ns   | False       |
| PTSD      | sex_Male_vs_Female | 0.056  | 0.907    | ns   | False       |
| Reference | eyes_EC_vs_EO      | 0.034  | 0.757    | ns   | False       |
| ADHD      | eyes_EC_vs_EO      | 0.063  | 0.036    | *    | True        |
| ASD       | eyes_EC_vs_EO      | 0.031  | 0.771    | ns   | False       |
| Alzheimer | eyes_EC_vs_EO      | —      | —        | —    | False       |
| FTD       | eyes_EC_vs_EO      | —      | —        | —    | False       |
| Anxiety   | eyes_EC_vs_EO      | 0.157  | 0.009    | **   | True        |
| PTSD      | eyes_EC_vs_EO      | 0.035  | 0.805    | ns   | False       |

89

**Supplementary Table S9: Regional Binary Classification AUC**

| Dx        | L.Fr          | L.Oc          | L.Pa          | L.Te          | M.Fr          | M.Oc          | M.Pa          | R.Fr          | R.Oc          | R.Pa          | R.Te          |
|-----------|---------------|---------------|---------------|---------------|---------------|---------------|---------------|---------------|---------------|---------------|---------------|
| ADHD      | 0.559 ± 0.033 | 0.543 ± 0.045 | 0.563 ± 0.059 | 0.560 ± 0.048 | 0.566 ± 0.051 | 0.546 ± 0.053 | 0.573 ± 0.033 | 0.552 ± 0.035 | 0.542 ± 0.043 | 0.558 ± 0.068 | 0.570 ± 0.049 |
| ASD       | 0.577 ± 0.061 | 0.573 ± 0.079 | 0.571 ± 0.042 | 0.546 ± 0.081 | 0.576 ± 0.086 | 0.567 ± 0.065 | 0.567 ± 0.057 | 0.575 ± 0.076 | 0.568 ± 0.084 | 0.583 ± 0.059 | 0.580 ± 0.086 |
| Alzheimer | 0.896 ± 0.136 | 0.939 ± 0.102 | 0.917 ± 0.095 | 0.902 ± 0.107 | 0.931 ± 0.081 | nan ± nan     | 0.914 ± 0.096 | 0.881 ± 0.134 | 0.956 ± 0.075 | 0.904 ± 0.085 | 0.924 ± 0.107 |
| Anxiety   | 0.552 ± 0.049 | 0.520 ± 0.055 | 0.527 ± 0.045 | 0.544 ± 0.045 | 0.539 ± 0.052 | 0.542 ± 0.044 | 0.533 ± 0.050 | 0.553 ± 0.048 | 0.521 ± 0.073 | 0.524 ± 0.067 | 0.551 ± 0.065 |
| FTD       | 0.851 ± 0.187 | 0.928 ± 0.116 | 0.877 ± 0.165 | 0.901 ± 0.150 | 0.800 ± 0.198 | nan ± nan     | 0.817 ± 0.264 | 0.703 ± 0.257 | 0.900 ± 0.115 | 0.890 ± 0.138 | 0.799 ± 0.178 |
| PTSD      | 0.510 ± 0.120 | 0.514 ± 0.087 | 0.487 ± 0.106 | 0.504 ± 0.133 | 0.559 ± 0.105 | 0.534 ± 0.136 | 0.510 ± 0.151 | 0.513 ± 0.101 | 0.462 ± 0.096 | 0.544 ± 0.132 | 0.494 ± 0.111 |

90

91 **Supplementary Table S10: Complete LDA Classification Results**

92 Area under the receiver operating characteristic curve (AUC) and permutation-test p-values for all classifier  
 93 variants.

| Comparison             | AUC           | p-value  | Sig. | Type                |
|------------------------|---------------|----------|------|---------------------|
| Reference (OvR)        | 0.631         | < 0.0001 | ***  | multiclass_OvR      |
| ADHD (OvR)             | 0.590         | < 0.0001 | ***  | multiclass_OvR      |
| ASD (OvR)              | 0.621         | 0.011    | *    | multiclass_OvR      |
| Alzheimer (OvR)        | 0.841         | < 0.0001 | ***  | multiclass_OvR      |
| FTD (OvR)              | 0.743         | < 0.0001 | ***  | multiclass_OvR      |
| Anxiety (OvR)          | 0.556         | 0.098    | n.s. | multiclass_OvR      |
| PTSD (OvR)             | 0.490         | 0.550    | n.s. | multiclass_OvR      |
| micro-average (OvR)    | 0.852         | < 0.0001 | ***  | multiclass_OvR      |
| macro-average (OvR)    | 0.639         | < 0.0001 | ***  | multiclass_OvR      |
| Overall accuracy       | 0.542 / 0.529 | < 0.0001 | ***  | multiclass_accuracy |
| ADHD vs Reference      | 0.592         | < 0.0001 | ***  | binary              |
| ASD vs Reference       | 0.614         | 0.0002   | ***  | binary              |
| Alzheimer vs Reference | 0.945         | < 0.0001 | ***  | binary              |
| FTD vs Reference       | 0.910         | < 0.0001 | ***  | binary              |
| Anxiety vs Reference   | 0.568         | 0.006    | **   | binary              |
| PTSD vs Reference      | 0.553         | 0.138    | n.s. | binary              |
| ADHD vs ASD            | 0.582         | 0.0045   | **   | binary              |
| Alzheimer vs FTD       | 0.515         | 0.749    | n.s. | binary              |
| Anxiety vs PTSD        | 0.528         | 0.713    | n.s. | binary              |

94 **Supplementary Table S11: LOFO Feature Importance**

95 Per-diagnosis change in AUC when each feature is removed ( $\Delta AUC = AUC_{baseline} - AUC_{without\_feature}$ ,  
 96 expressed as a percentage). Positive values indicate the feature aids discrimination (removing it drops AUC);  
 97 negative values indicate the feature is redundant or confounded. Green shading:  $\Delta AUC \geq +1\%$ . Red shading:  
 98  $\Delta AUC \leq -1\%$ . Bold:  $|\Delta AUC| \geq 2\%$ .

| Dx   | PAF    | 1/fs   | 1/fi   | $\delta$ | $\theta$ | $\alpha$ | $\beta$ | $\gamma$ | $\theta/\beta$ | $\theta/\alpha$ | f/s    |
|------|--------|--------|--------|----------|----------|----------|---------|----------|----------------|-----------------|--------|
| ADHD | -0.35% | +0.03% | +0.23% | -0.15%   | -0.15%   | -0.19%   | -0.14%  | +0.32%   | +0.24%         | +0.07%          | +0.20% |

| Dx        | PAF    | 1/fs   | 1/fi   | $\delta$ | $\theta$ | $\alpha$ | $\beta$ | $\gamma$ | $\theta/\beta$ | $\theta/\alpha$ | f/s    |
|-----------|--------|--------|--------|----------|----------|----------|---------|----------|----------------|-----------------|--------|
| ASD       | +0.28% | -0.24% | -0.36% | +0.19%   | -0.50%   | +0.05%   | -0.09%  | +1.21%   | +0.49%         | -0.19%          | +0.58% |
| Alzheimer | +0.43% | +0.87% | -0.02% | +1.76%   | -0.23%   | +0.31%   | +1.76%  | +2.11%   | +1.55%         | +0.22%          | +0.98% |
| FTD       | +0.37% | 0.00%  | +0.30% | +2.26%   | -1.25%   | 0.00%    | +2.31%  | +1.30%   | +1.39%         | +0.63%          | +1.30% |
| Anxiety   | -0.77% | -0.48% | +4.03% | -0.23%   | -0.25%   | -0.05%   | -0.13%  | -0.40%   | -0.16%         | -0.20%          | -0.16% |
| PTSD      | +2.47% | -1.51% | +3.14% | +0.43%   | -0.54%   | -0.08%   | -0.02%  | -0.72%   | -1.51%         | +0.16%          | -0.10% |

99 Baseline binary-vs-Reference AUCs (for context): ADHD 0.592, ASD 0.614, Alzheimer 0.945, FTD 0.910,  
100 Anxiety 0.568, PTSD 0.553.

101 **Supplementary Table S12: Summary Table (Figure 5 data)**

| Feature         | Lifespan      | $\sigma$                     | AD                      | FTD                      | ADHD                     | ASD                      | Anx                      | PTSD       |
|-----------------|---------------|------------------------------|-------------------------|--------------------------|--------------------------|--------------------------|--------------------------|------------|
| $\delta$ [dB]   | decrease      | $\uparrow\sigma \rightarrow$ | +0.44 *** $\checkmark$  | +0.33 * $\checkmark$     | -0.15 *** $\rightarrow$  | -0.17 ** $\rightarrow$   | -0.07 n.s.               | -0.10 n.s. |
| $\theta$ [dB]   | non-monotonic | $\rightarrow\sigma$          | +0.65 *** $\checkmark$  | +0.60 *** $\checkmark$   | +0.14 *** $\checkmark$   | +0.21 *** $\rightarrow$  | +0.06 n.s.               | +0.16 n.s. |
| $\alpha$ [dB]   | non-monotonic | $\uparrow\sigma\downarrow$   | -0.66 *** $\checkmark$  | -0.52 *** $\checkmark$   | +0.18 *** $\chi$         | +0.15 ** $\rightarrow$   | +0.12 * $\rightarrow$    | +0.08 n.s. |
| $\beta$ [dB]    | increase      | $\uparrow\sigma \rightarrow$ | -0.60 *** $\checkmark$  | -0.38 ** $\checkmark$    | +0.07 n.s. $\rightarrow$ | +0.12 n.s. $\rightarrow$ | +0.04 n.s.               | -0.01 n.s. |
| $\gamma$ [dB]   | increase      | $\uparrow\sigma$             | +0.22 n.s. $\checkmark$ | +0.09 n.s.               | +0.03 n.s.               | +0.13 * $\checkmark$     | +0.03 n.s.               | -0.00 n.s. |
| PAF             | non-monotonic | $\rightarrow\sigma$          | -0.28 * $\checkmark$    | +0.05 n.s. $\rightarrow$ | -0.02 n.s.               | -0.09 n.s.               | -0.03 n.s.               | -0.21 n.s. |
| 1/f slope       | decrease      | $\sim\sigma$                 | +0.35 ** $\star$        | +0.14 n.s.               | -0.01 n.s.               | -0.08 n.s.               | +0.00 n.s.               | -0.02 n.s. |
| 1/f int.        | decrease      | $\sim\sigma$                 | +0.57 *** $\star$       | +0.41 ** $\star$         | +0.12 ** $\star$         | +0.07 n.s.               | +0.15 ** $\star$         | +0.16 n.s. |
| $\theta/\beta$  | decrease      | $\sim\sigma$                 | +0.66 *** $\checkmark$  | +0.51 *** $\checkmark$   | +0.03 n.s. $\chi$        | +0.03 n.s.               | +0.01 n.s.               | +0.16 n.s. |
| $\theta/\alpha$ | non-monotonic | $\sim\sigma$                 | +0.79 *** $\checkmark$  | +0.72 *** $\checkmark$   | -0.12 ** $\rightarrow$   | -0.07 n.s.               | -0.10 n.s. $\rightarrow$ | +0.01 n.s. |
| Fast/Slow       | increase      | $\sim\sigma$                 | -0.69 *** $\checkmark$  | -0.59 *** $\checkmark$   | +0.15 *** $\rightarrow$  | +0.15 ** $\rightarrow$   | +0.11 * $\checkmark$     | +0.05 n.s. |

102

103 **Supplementary Table S13: Extended Deviation Statistics by Diagnostic**  
104 **Category**

105 **Supplementary Table S13.** Extended univariate deviation statistics for each diagnostic cohort versus the held-out normative  
106 reference. For each spectral feature: median and mean z-score, standard deviation, rank-biserial correlation (r), Cohen's d, and  
107 FDR-corrected significance. Features are presented in narrow-band dB scale. Significance uses global BH-FDR correction  
108 across all diagnosis-feature comparisons (\* q<0.05, \*\* q<0.01, \*\*\* q<0.001), concordant with the main manuscript.

109

110 **Table S13 – Alzheimer's disease and FTD**

| Diagnosis | Feature       | N  | Median z | Mean z | SD    | r      | Cohen's d | q        | Sig. |
|-----------|---------------|----|----------|--------|-------|--------|-----------|----------|------|
| AD        | $\delta$ [dB] | 36 | +0.888   | +0.803 | 1.195 | +0.442 | +1.041    | 5.98e-05 | ***  |
| AD        | $\theta$ [dB] | 36 | +1.625   | +1.586 | 1.415 | +0.650 | +1.833    | 1.39e-09 | ***  |
| AD        | $\alpha$ [dB] | 36 | -2.410   | -2.014 | 1.745 | -0.664 | -2.249    | 7.87e-10 | ***  |
| AD        | $\beta$ [dB]  | 36 | -1.208   | -1.070 | 1.188 | -0.597 | -1.298    | 3.24e-08 | ***  |
| AD        | $\gamma$ [dB] | 36 | +0.316   | +0.202 | 0.745 | +0.219 | +0.352    | 0.0574   | n.s. |
| AD        | PAF           | 36 | -0.408   | -0.240 | 0.878 | -0.284 | -0.419    | 0.0113   | *    |
| AD        | 1/f slope     | 36 | +0.559   | +0.541 | 0.905 | +0.348 | +0.767    | 0.0017   | **   |

|     |                 |    |        |        |       |        |        |          |      |
|-----|-----------------|----|--------|--------|-------|--------|--------|----------|------|
| AD  | 1/f int.        | 36 | +0.884 | +0.889 | 0.926 | +0.574 | +1.396 | 1.07e-07 | ***  |
| AD  | $\theta/\beta$  | 36 | +1.565 | +1.436 | 1.238 | +0.662 | +1.724 | 7.87e-10 | ***  |
| AD  | $\theta/\alpha$ | 36 | +3.611 | +2.798 | 1.940 | +0.787 | +3.011 | 3.39e-13 | ***  |
| AD  | F/S             | 36 | -2.281 | -1.905 | 1.550 | -0.686 | -2.171 | 3.10e-10 | ***  |
| FTD | $\delta$ [dB]   | 22 | +0.535 | +0.522 | 1.013 | +0.331 | +0.735 | 0.0197   | *    |
| FTD | $\theta$ [dB]   | 22 | +1.023 | +1.067 | 1.369 | +0.603 | +1.271 | 1.24e-05 | ***  |
| FTD | $\alpha$ [dB]   | 22 | -0.932 | -1.255 | 1.510 | -0.518 | -1.528 | 1.86e-04 | ***  |
| FTD | $\beta$ [dB]    | 22 | -0.860 | -0.722 | 1.146 | -0.378 | -0.906 | 0.0074   | **   |
| FTD | $\gamma$ [dB]   | 22 | +0.058 | +0.035 | 0.821 | +0.095 | +0.108 | 0.5680   | n.s. |
| FTD | PAF             | 22 | +0.022 | +0.058 | 0.819 | +0.050 | +0.042 | 0.7629   | n.s. |
| FTD | 1/f slope       | 22 | +0.104 | +0.485 | 1.289 | +0.143 | +0.668 | 0.3618   | n.s. |
| FTD | 1/f int.        | 22 | +0.652 | +0.795 | 1.406 | +0.413 | +1.194 | 0.0033   | **   |
| FTD | $\theta/\beta$  | 22 | +0.693 | +0.968 | 1.085 | +0.513 | +1.211 | 1.98e-04 | ***  |
| FTD | $\theta/\alpha$ | 22 | +1.600 | +1.886 | 1.620 | +0.718 | +2.247 | 1.16e-07 | ***  |
| FTD | F/S             | 22 | -1.176 | -1.284 | 1.319 | -0.588 | -1.571 | 2.07e-05 | ***  |

111

112

Table S13 – ADHD and ASD

| Diagnosis | Feature         | N    | Median z | Mean z | SD    | r      | Cohen's d | q        | Sig. |
|-----------|-----------------|------|----------|--------|-------|--------|-----------|----------|------|
| ADHD      | $\delta$ [dB]   | 1034 | -0.270   | -0.271 | 0.600 | -0.147 | -0.274    | 7.43e-05 | ***  |
| ADHD      | $\theta$ [dB]   | 1034 | +0.188   | +0.184 | 0.562 | +0.138 | +0.267    | 1.98e-04 | ***  |
| ADHD      | $\alpha$ [dB]   | 1034 | +0.253   | +0.254 | 0.578 | +0.176 | +0.307    | 1.66e-06 | ***  |
| ADHD      | $\beta$ [dB]    | 1034 | +0.079   | +0.096 | 0.592 | +0.071 | +0.096    | 0.0663   | n.s. |
| ADHD      | $\gamma$ [dB]   | 1034 | +0.045   | +0.003 | 0.491 | +0.031 | +0.076    | 0.4587   | n.s. |
| ADHD      | PAF             | 1034 | +0.004   | +0.004 | 0.503 | -0.021 | -0.049    | 0.6381   | n.s. |
| ADHD      | 1/f slope       | 1034 | -0.031   | -0.025 | 0.505 | -0.014 | -0.041    | 0.7629   | n.s. |
| ADHD      | 1/f int.        | 1034 | +0.133   | +0.108 | 0.443 | +0.123 | +0.242    | 0.0011   | **   |
| ADHD      | $\theta/\beta$  | 1034 | +0.008   | +0.027 | 0.597 | +0.033 | +0.082    | 0.4450   | n.s. |
| ADHD      | $\theta/\alpha$ | 1034 | -0.177   | -0.175 | 0.580 | -0.120 | -0.186    | 0.0014   | **   |
| ADHD      | F/S             | 1034 | +0.228   | +0.248 | 0.613 | +0.149 | +0.261    | 6.00e-05 | ***  |
| ASD       | $\delta$ [dB]   | 174  | -0.320   | -0.290 | 0.670 | -0.168 | -0.261    | 0.0038   | **   |
| ASD       | $\theta$ [dB]   | 174  | +0.321   | +0.280 | 0.676 | +0.209 | +0.350    | 2.41e-04 | ***  |
| ASD       | $\alpha$ [dB]   | 174  | +0.230   | +0.255 | 0.712 | +0.155 | +0.257    | 0.0081   | **   |
| ASD       | $\beta$ [dB]    | 174  | +0.182   | +0.158 | 0.758 | +0.115 | +0.157    | 0.0561   | n.s. |
| ASD       | $\gamma$ [dB]   | 174  | +0.110   | +0.121 | 0.620 | +0.135 | +0.242    | 0.0220   | *    |
| ASD       | PAF             | 174  | -0.135   | -0.064 | 0.651 | -0.090 | -0.150    | 0.1523   | n.s. |
| ASD       | 1/f slope       | 174  | -0.057   | -0.103 | 0.613 | -0.076 | -0.152    | 0.2265   | n.s. |
| ASD       | 1/f int.        | 174  | +0.060   | +0.070 | 0.525 | +0.072 | +0.140    | 0.2484   | n.s. |
| ASD       | $\theta/\beta$  | 174  | +0.032   | +0.041 | 0.831 | +0.026 | +0.084    | 0.7060   | n.s. |
| ASD       | $\theta/\alpha$ | 174  | -0.126   | -0.130 | 0.722 | -0.074 | -0.098    | 0.2348   | n.s. |
| ASD       | F/S             | 174  | +0.284   | +0.257 | 0.717 | +0.153 | +0.234    | 0.0087   | **   |

113

114

Table S13 – Anxiety and PTSD

| Diagnosis | Feature       | N   | Median z | Mean z | SD    | r      | Cohen's d | q      | Sig. |
|-----------|---------------|-----|----------|--------|-------|--------|-----------|--------|------|
| Anxiety   | $\delta$ [dB] | 272 | -0.212   | -0.179 | 0.764 | -0.074 | -0.115    | 0.1748 | n.s. |
| Anxiety   | $\theta$ [dB] | 272 | +0.107   | +0.085 | 0.679 | +0.059 | +0.094    | 0.2791 | n.s. |
| Anxiety   | $\alpha$ [dB] | 272 | +0.231   | +0.193 | 0.774 | +0.122 | +0.174    | 0.0167 | *    |
| Anxiety   | $\beta$ [dB]  | 272 | +0.084   | +0.056 | 0.728 | +0.045 | +0.030    | 0.4345 | n.s. |

|         |                 |     |        |        |       |        |        |        |      |
|---------|-----------------|-----|--------|--------|-------|--------|--------|--------|------|
| Anxiety | $\gamma$ [dB]   | 272 | +0.022 | -0.018 | 0.618 | +0.025 | +0.032 | 0.6827 | n.s. |
| Anxiety | PAF             | 272 | -0.026 | +0.002 | 0.609 | -0.033 | -0.047 | 0.5712 | n.s. |
| Anxiety | 1/f slope       | 272 | -0.009 | -0.000 | 0.615 | +0.004 | +0.002 | 0.9615 | n.s. |
| Anxiety | 1/f int.        | 272 | +0.161 | +0.142 | 0.556 | +0.145 | +0.261 | 0.0038 | **   |
| Anxiety | $\theta/\beta$  | 272 | +0.034 | -0.006 | 0.725 | +0.014 | +0.028 | 0.8130 | n.s. |
| Anxiety | $\theta/\alpha$ | 272 | -0.202 | -0.169 | 0.728 | -0.096 | -0.149 | 0.0635 | n.s. |
| Anxiety | F/S             | 272 | +0.252 | +0.185 | 0.780 | +0.106 | +0.142 | 0.0410 | *    |
| PTSD    | $\delta$ [dB]   | 35  | -0.239 | -0.185 | 0.699 | -0.103 | -0.120 | 0.4295 | n.s. |
| PTSD    | $\theta$ [dB]   | 35  | +0.069 | +0.250 | 0.785 | +0.157 | +0.298 | 0.1935 | n.s. |
| PTSD    | $\alpha$ [dB]   | 35  | +0.139 | +0.124 | 0.806 | +0.076 | +0.086 | 0.5680 | n.s. |
| PTSD    | $\beta$ [dB]    | 35  | -0.054 | -0.048 | 0.869 | -0.013 | -0.099 | 0.9442 | n.s. |
| PTSD    | $\gamma$ [dB]   | 35  | +0.079 | -0.068 | 0.613 | -0.001 | -0.043 | 0.9905 | n.s. |
| PTSD    | PAF             | 35  | -0.261 | -0.213 | 0.584 | -0.214 | -0.394 | 0.0662 | n.s. |
| PTSD    | 1/f slope       | 35  | +0.045 | +0.018 | 0.651 | -0.015 | +0.030 | 0.9382 | n.s. |
| PTSD    | 1/f int.        | 35  | +0.146 | +0.163 | 0.512 | +0.159 | +0.289 | 0.1902 | n.s. |
| PTSD    | $\theta/\beta$  | 35  | +0.333 | +0.252 | 1.053 | +0.160 | +0.338 | 0.1902 | n.s. |
| PTSD    | $\theta/\alpha$ | 35  | -0.099 | +0.029 | 0.864 | +0.007 | +0.102 | 0.9615 | n.s. |
| PTSD    | F/S             | 35  | +0.162 | +0.084 | 0.812 | +0.054 | +0.016 | 0.6897 | n.s. |

115

116 **Table S14. – Feature-wise normative trajectories and disorder-specific**  
117 **group-level deviations**

118 Normative trajectories with literature consensus comparison and reference  $\uparrow$ : Increase;  $\downarrow$ : Decrease..  
119 Disorder-specific group-level deviation trends with effect sizes (rank-biserial r), significance, and  
120 literature consensus comparison. Per-result consensus is reported via symbols:  $\checkmark$ : agreed;  $\rightarrow$ : extended;  
121  $\times$ : disputed;  $\star$ : novel results. \*  $q < 0.05$ ; \*\*  $q < 0.01$ ; \*\*\*  $q < 0.001$ ; n.s.: non-significant.

|               | Median Trend                                                                                                                                                          | Variance Trend                                                  | Alzheimer's (n=36)     | FTD (n=22)             | ADHD (n=1034)           | ASD (n=174)             | Anxiety (n=272)       | PTSD (n=35) | Consensus                                                                                                                                                                                                                 |
|---------------|-----------------------------------------------------------------------------------------------------------------------------------------------------------------------|-----------------------------------------------------------------|------------------------|------------------------|-------------------------|-------------------------|-----------------------|-------------|---------------------------------------------------------------------------------------------------------------------------------------------------------------------------------------------------------------------------|
| $\delta$ [dB] | Steep decrease childhood/adolescence ( $-9.3 \times 10^{-3}$ FBP/yr); deceleration from ~20 yr; net $-0.22$ FBP ( $-1.48$ dB) $\checkmark_{14-15-65-69}$              | $\uparrow$ until ~20 yr, then stable                            | +0.44 *** $\checkmark$ | +0.33 * $\checkmark$   | -0.15 *** $\rightarrow$ | -0.17 ** $\rightarrow$  | -0.07 n.s.            | -0.10 n.s.  | Developmental $\downarrow$ universally confirmed. AD/FTD: $\delta \uparrow$ (cortical slowing; AD > FTD). ADHD/ASD: $\delta \downarrow$ (opposes simple slowing). Anxiety: mild $\delta \downarrow$ . PTSD: underpowered. |
| $\theta$ [dB] | U-like: Early life decline with midlife increase ( $-0.9 \times 10^{-3}$ FBP/yr); net $-0.04$ FBP ( $-2.21$ dB); smallest of slow bands $\checkmark_{14-15-65-69}$    | Near-constant; slight $\downarrow$ parietal/occipital ~15-20 yr | +0.65 *** $\checkmark$ | +0.60 *** $\checkmark$ | +0.14 *** $\checkmark$  | +0.21 *** $\rightarrow$ | +0.06 n.s.            | +0.16 n.s.  | Lifespan U-like confirmed. AD: $\theta \uparrow$ (strongest signature). FTD: $\theta \uparrow$ (general dementia). ADHD: $\theta \uparrow$ (replicated, heterogeneous). ASD: $\theta \uparrow$ . Anxiety/PTSD: n.s.       |
| $\alpha$ [dB] | Inverted-U: fast $\uparrow$ childhood ( $+3 \times 10^{-3}$ FBP/yr, 1-20 yr); peak ~20-30 yr; slow $\downarrow$ after; net $\sim 0$ FBP $\checkmark_{15-65-67-70-72}$ | $\uparrow$ , peaks ~20 yr, then $\downarrow$                    | -0.66 *** $\checkmark$ | -0.52 *** $\checkmark$ | +0.18 *** $\times$      | +0.15 ** $\rightarrow$  | +0.12 * $\rightarrow$ | +0.08 n.s.  | Inverted-U trajectory confirmed. AD: $\alpha \downarrow$ (cholinergic loss). FTD: $\alpha \downarrow$ (stronger than expected). ADHD/ASD/Anxiety: $\alpha \uparrow$                                                       |

|                                   |                                                                                                                                                          |                                       |                            |                             |                            |                           |                          |            |                                                                                                                                                                                                                                                 |
|-----------------------------------|----------------------------------------------------------------------------------------------------------------------------------------------------------|---------------------------------------|----------------------------|-----------------------------|----------------------------|---------------------------|--------------------------|------------|-------------------------------------------------------------------------------------------------------------------------------------------------------------------------------------------------------------------------------------------------|
|                                   |                                                                                                                                                          |                                       |                            |                             |                            |                           |                          |            | (opposes traditional view).<br>PTSD: n.s.                                                                                                                                                                                                       |
| <b><math>\beta</math> [dB]</b>    | Rapid $\uparrow$ early life ( $0.6 \times 10^{-3}$ FBP/yr until 20 yr; +8.10 dB); slower after $\sim 20$ yr $\checkmark^{15-66-67}$                      | Developmental rise then stabilization | -0.60 ***<br>$\checkmark$  | -0.38 **<br>$\checkmark$    | +0.07 n.s. $\rightarrow$   | +0.12 n.s. $\rightarrow$  | +0.04 n.s.               | -0.01 n.s. | Developmental $\uparrow$ confirmed. AD: $\beta \downarrow$ (strong). FTD: $\beta \downarrow$ (partial). ADHD: mild $\beta \uparrow$ (challenges traditional $\beta \downarrow$ ). ASD: mild $\beta \uparrow$ . Anxiety/PTSD: n.s.               |
| <b><math>\gamma</math> [dB]</b>   | Slow monotonic $\uparrow$ ( $1.2 \times 10^{-3}$ FBP/yr; net +0.06 FBP, +11.28 dB); sustained slopes through adulthood $\checkmark^{15-66-67}$           | $\uparrow$ with regional plateaus     | +0.22 n.s.<br>$\checkmark$ | +0.09 n.s.                  | +0.03 n.s.                 | +0.13 *<br>$\checkmark$   | +0.03 n.s.               | -0.00 n.s. | Monotonic $\uparrow$ normatively. ASD: $\gamma \uparrow$ significant. No other disorder showed significant $\gamma$ deviation. Remains heterogeneous and understudied.                                                                          |
| <b>PAF</b>                        | Rise in childhood; peak $\sim 20-30$ yr; slow $\downarrow$ ; local minimum $\sim 60$ yr; late-life rebound $\checkmark^{65-70-72}$                       | Constant across lifespan              | -0.28 *<br>$\checkmark$    | +0.05 n.s.<br>$\rightarrow$ | -0.02 n.s.                 | -0.09 n.s.                | -0.03 n.s.               | -0.21 n.s. | PAF slowing confirmed in AD (hallmark); FTD preserves PAF vs AD (key differential). No reliable marker in neurodevelopmental/psychiatric conditions.                                                                                            |
| <b>1/f slope</b>                  | Monotonic $\downarrow$ ; steeper $< 20$ yr; deceleration early adulthood; subtle inflection $\sim 50$ yr $\checkmark^{72-75-76}$                         | Follows trend pattern                 | +0.35 **<br>$\star$        | +0.14 n.s.                  | -0.01 n.s.                 | -0.08 n.s.                | +0.00 n.s.               | -0.02 n.s. | Monotonic $\downarrow$ confirmed. AD: steeper 1/f (novel, normative-referenced). All other cohorts: n.s.                                                                                                                                        |
| <b>1/f int.</b>                   | Monotonic $\downarrow$ ; parallel to slope; steeper $< 20$ yr; inflection $\sim 50$ yr $\checkmark^{72-75-76}$                                           | Follows trend pattern                 | +0.57 ***<br>$\star$       | +0.41 **<br>$\star$         | +0.12 **<br>$\star$        | +0.07 n.s.                | +0.15 **<br>$\star$      | +0.16 n.s. | Monotonic $\downarrow$ confirmed. AD/FTD: elevated broadband power (novel). ADHD/Anxiety: significant elevation (novel aperiodic finding). ASD/PTSD: n.s.                                                                                       |
| <b><math>\theta/\beta</math></b>  | Consistent $\downarrow$ across lifespan; dominated by $\theta$ decline and $\beta$ rise $\checkmark^{9-57-58}$                                           | Follows component patterns            | +0.66 ***<br>$\checkmark$  | +0.51 ***<br>$\checkmark$   | +0.03 n.s. $\times$        | +0.03 n.s.                | +0.01 n.s.               | +0.16 n.s. | Lifespan $\downarrow$ confirmed. AD: $\theta/\beta \uparrow$ (strong). FTD: $\theta/\beta \uparrow$ . ADHD: n.s. (challenges FDA-approved TBR). ASD/Anxiety/PTSD: n.s.                                                                          |
| <b><math>\theta/\alpha</math></b> | $\downarrow$ ; mirrors $\theta$ decline relative to $\alpha$ trajectory $\checkmark^{37-48-53-77-78}$                                                    | Follows component patterns            | +0.79 ***<br>$\checkmark$  | +0.72 ***<br>$\checkmark$   | -0.12 **<br>$\rightarrow$  | -0.07 n.s.                | -0.10 n.s. $\rightarrow$ | +0.01 n.s. | Lifespan $\downarrow$ confirmed, $\theta-\alpha$ interplay. AD: $\theta/\alpha \uparrow$ (largest effect, $r=+0.79$ ). FTD: $\theta/\alpha \uparrow$ (strongest). ADHD: $\theta/\alpha \downarrow$ (novel). Anxiety: trend. PTSD: underpowered. |
| <b>Fast/Slow</b>                  | Steady $\uparrow$ ; dominated by $\delta$ decline and $\alpha/\beta$ rise; steep first half of lifespan, decelerates after $\checkmark^{37-48-53-77-78}$ | Follows component patterns            | -0.69 ***<br>$\checkmark$  | -0.59 ***<br>$\checkmark$   | +0.15 ***<br>$\rightarrow$ | +0.15 **<br>$\rightarrow$ | +0.11 *<br>$\checkmark$  | +0.05 n.s. | Lifespan $\uparrow$ confirmed. AD/FTD: F/S $\downarrow$ (spectral slowing). ADHD/ASD/Anxiety: F/S $\uparrow$ (integrates elevations). PTSD: underpowered.                                                                                       |

## Supplementary Figure S1: LDA Classification

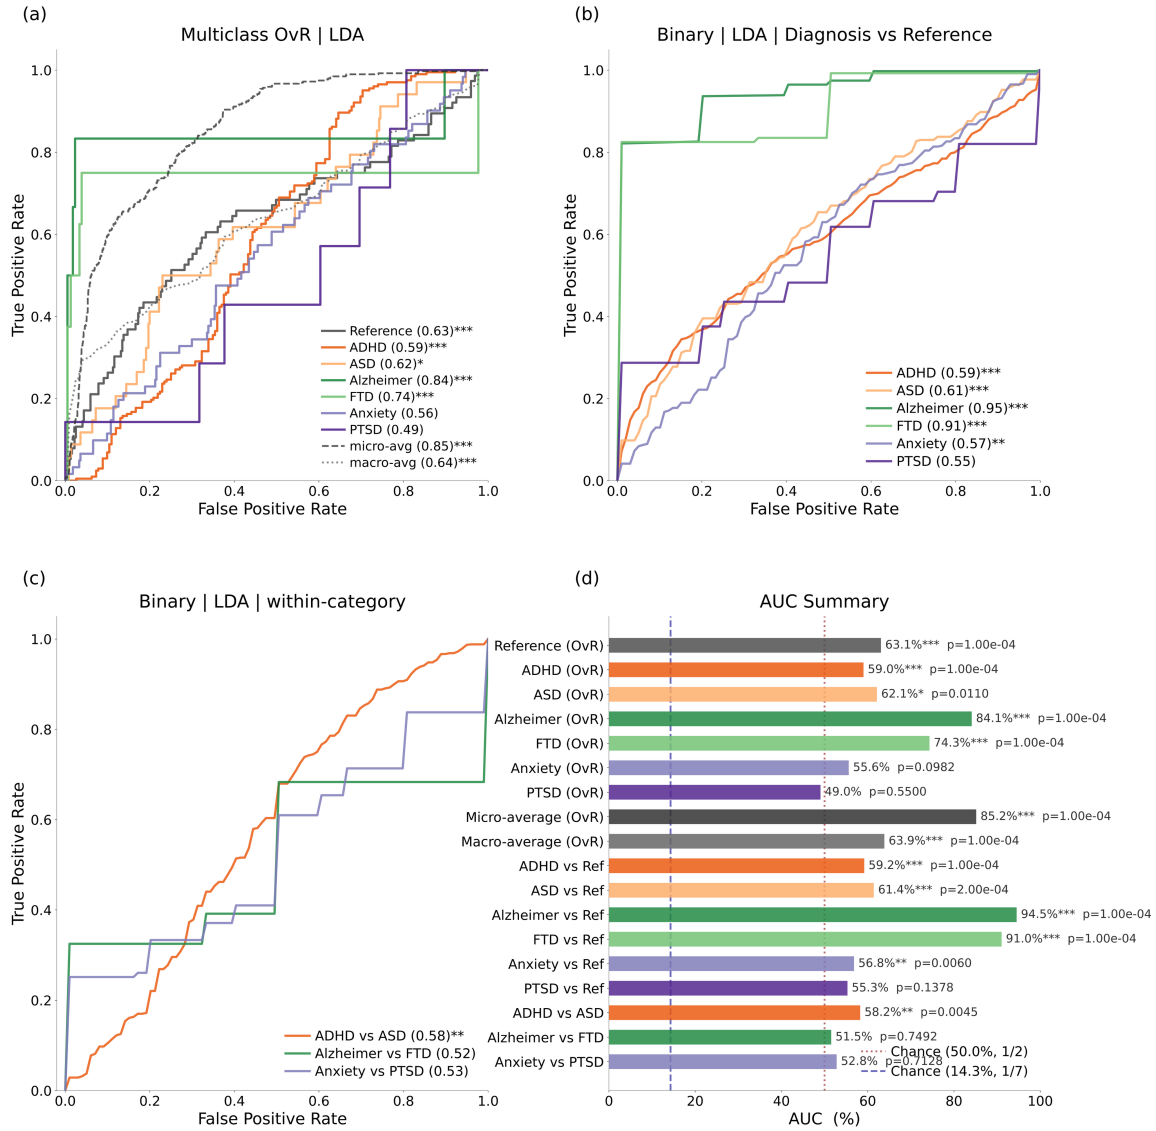

**Supplementary Figure S1.** Evaluation of LDA classifiers on EEG normative z-score features across diagnostic groups. Three classification strategies were compared using Linear Discriminant Analysis with 10-fold group-aware cross-validation on 11 subject-level EEG z-score features, pooled across the 11 lobar regions (mean). The analysis comprised N subjects from seven groups: Reference, ADHD, ASD, Alzheimer's disease, FTD, anxiety disorders, and PTSD (per-group counts in Table S10). **(a)** Multiclass one-vs-rest (OvR) ROC curves from a single 7-class classifier. Neurodegenerative conditions showed the strongest separability (Alzheimer's AUC = 0.84, FTD = 0.74), whereas neurodevelopmental and mental-health groups remained near chance. The micro-averaged ROC (AUC = 0.85) pools all binarised predictions and is dominated by the most prevalent classes; the macro-average (AUC = 0.64) provides a class-balanced summary. **(b)** Binary ROC curves from six independent classifiers, each trained to discriminate one diagnosis from the held-out reference cohort. Alzheimer's (AUC = 0.95) and FTD (AUC = 0.91) were again most separable. ADHD (0.59), ASD (0.61), anxiety (0.57), and PTSD (0.55) showed limited separability. **(c)** Within-category pairwise classifiers: ADHD vs ASD (AUC = 0.58), Alzheimer's vs FTD (0.52), anxiety vs PTSD (0.53), all at or near chance. **(d)** Summary of AUC values across all classifier variants with permutation-test p-values. Dashed lines indicate chance level (50% binary, 14.3% multiclass).

## Supplementary Figure S2: Full Trajectory Atlas

**Supplementary Figure S2.** Normative lifespan trajectories for all spectral features across cortical regions. Shaded bands represent the 25–75, 10–90, and 2.5–97.5 centile ranges for (a) female and (b) male trajectories separately. Features include narrow-band relative powers ( $\delta$ ,  $\theta$ ,  $\alpha$ ,  $\beta$ ,  $\gamma$  in FBP and dB), peak alpha frequency (PAF), aperiodic components ( $1/f$  slope and intercept), and band ratios ( $\theta/\beta$ ,  $\theta/\alpha$ , Fast/Slow). Trajectories are averaged across the 11 cortical regions.

### Sup. Figure S2a Female normative trajectories and ranges

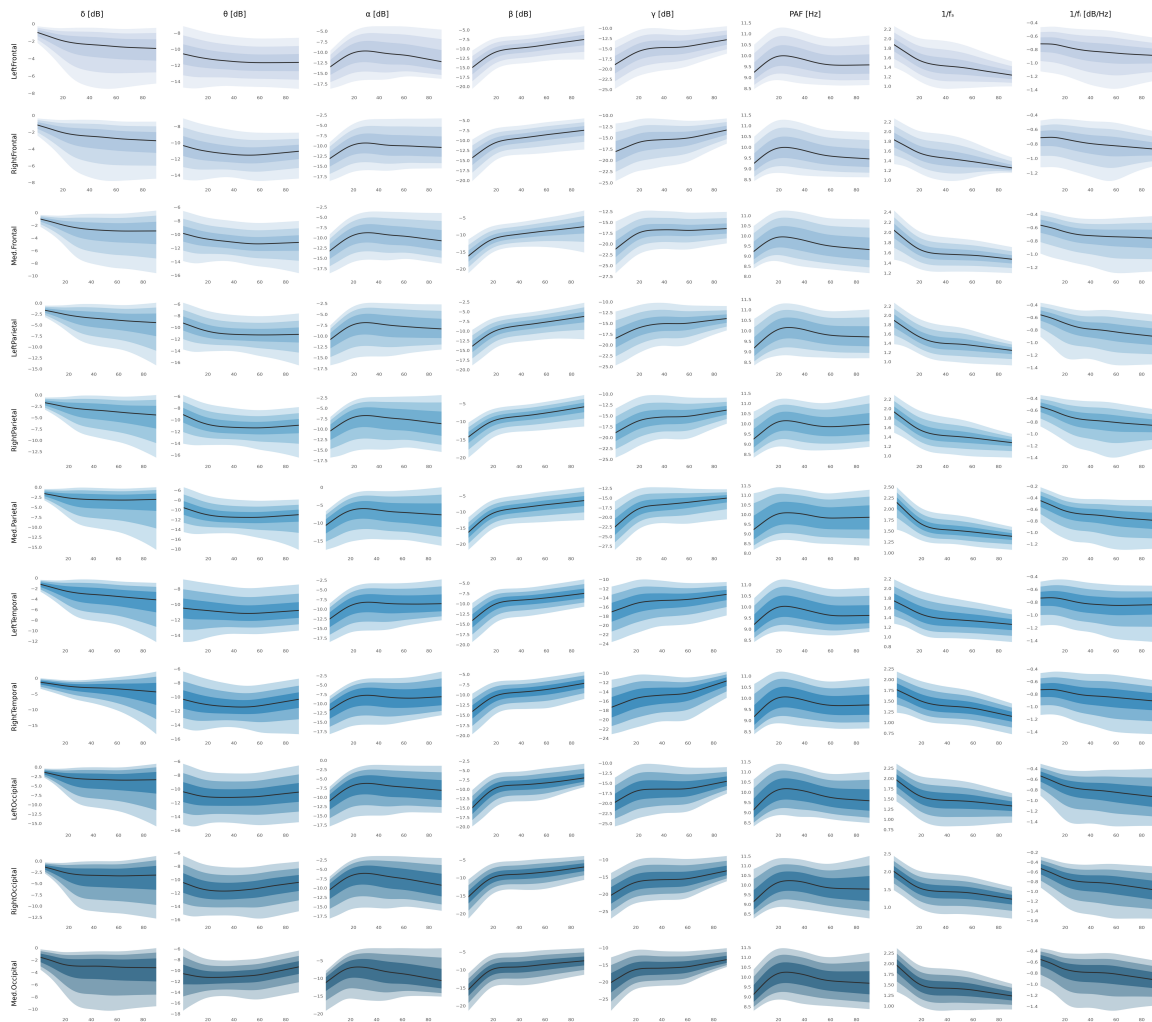

### Sup. Figure S2b Male normative trajectories and ranges

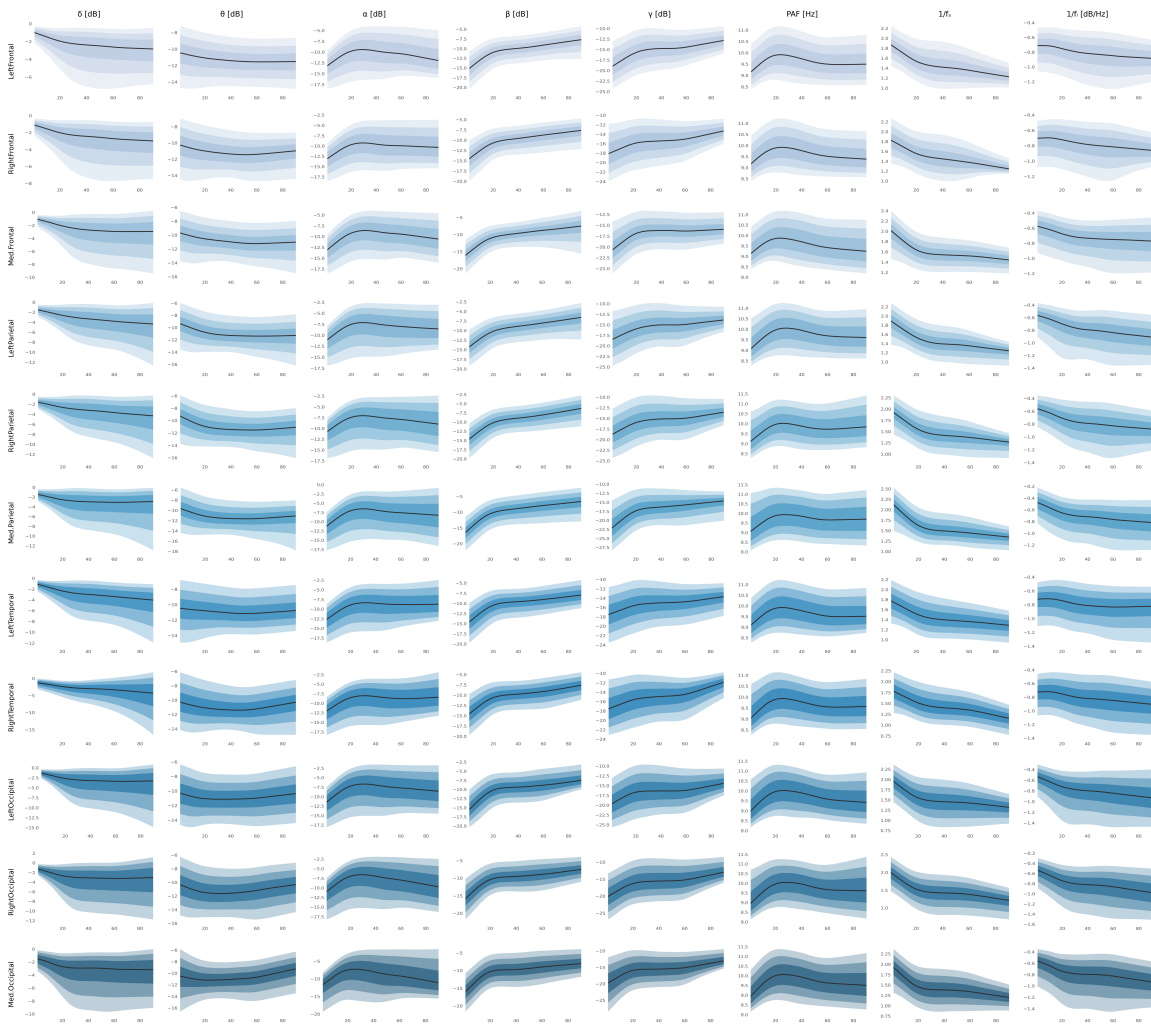

# Supplementary Figure S3: Neurodegenerative cohorts group Comparisons

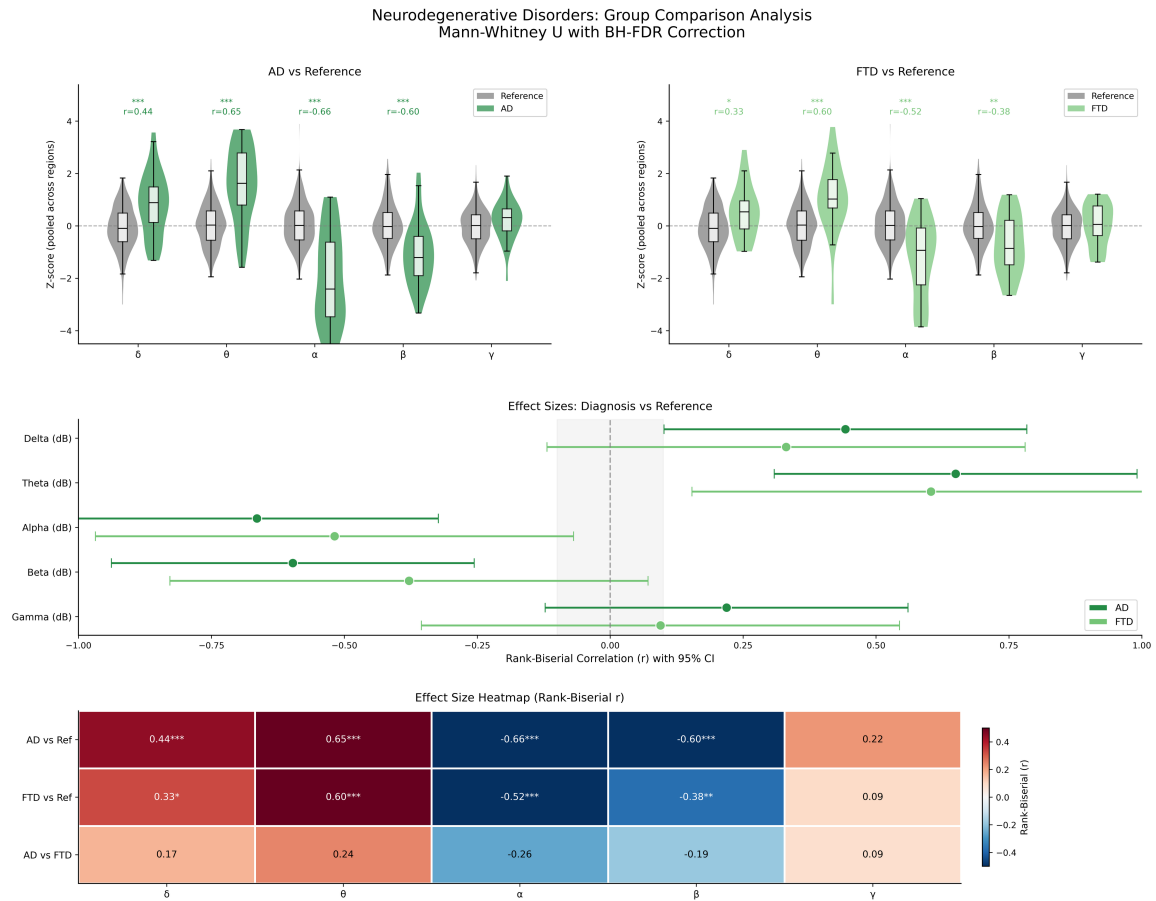

**Supplementary Figure S3.** Neurodegenerative cohort group comparisons. Z-score deviation profiles for Alzheimer’s disease (n=36) and frontotemporal dementia (FTD, n=22) compared against the held-out normative reference, shown per spectral feature and cortical region. Box plots show the distribution of z-scores; significance markers indicate FDR-corrected comparisons (BH; \*  $q < 0.05$ , \*\*  $q < 0.01$ , \*\*\*  $q < 0.001$ ).

# Supplementary Figure S4: Neurodevelopmental cohorts group Comparisons

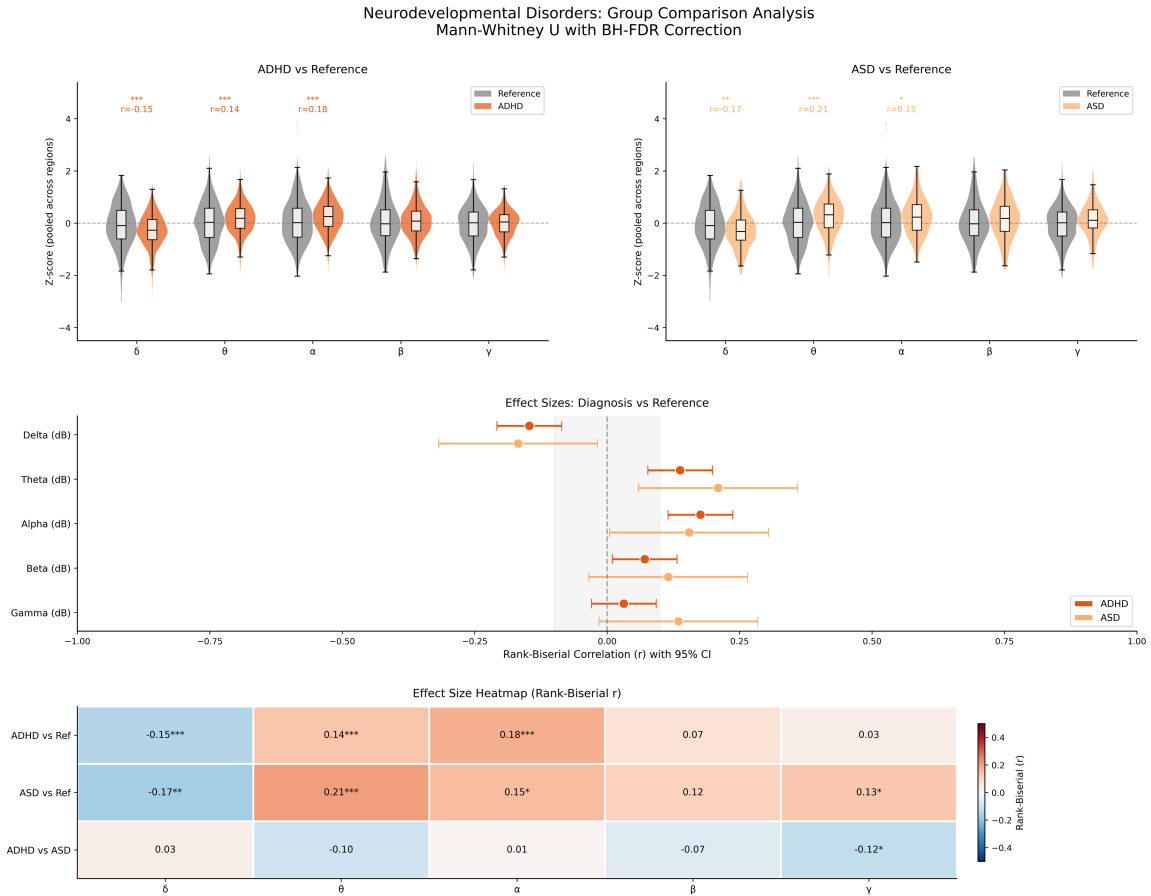

**Supplementary Figure S4.** Neurodevelopmental cohort group comparisons. Z-score deviation profiles for ADHD (n=1,034) and ASD (n=174) compared against the held-out normative reference, shown per spectral feature and cortical region. Box plots show the distribution of z-scores; significance markers indicate FDR-corrected comparisons (BH; \* q<0.05, \*\* q<0.01, \*\*\* q<0.001).

## Supplementary Figure S5: Psychiatric cohorts group Comparisons

Psychiatric Disorders: Group Comparison Analysis  
Mann-Whitney U with BH-FDR Correction

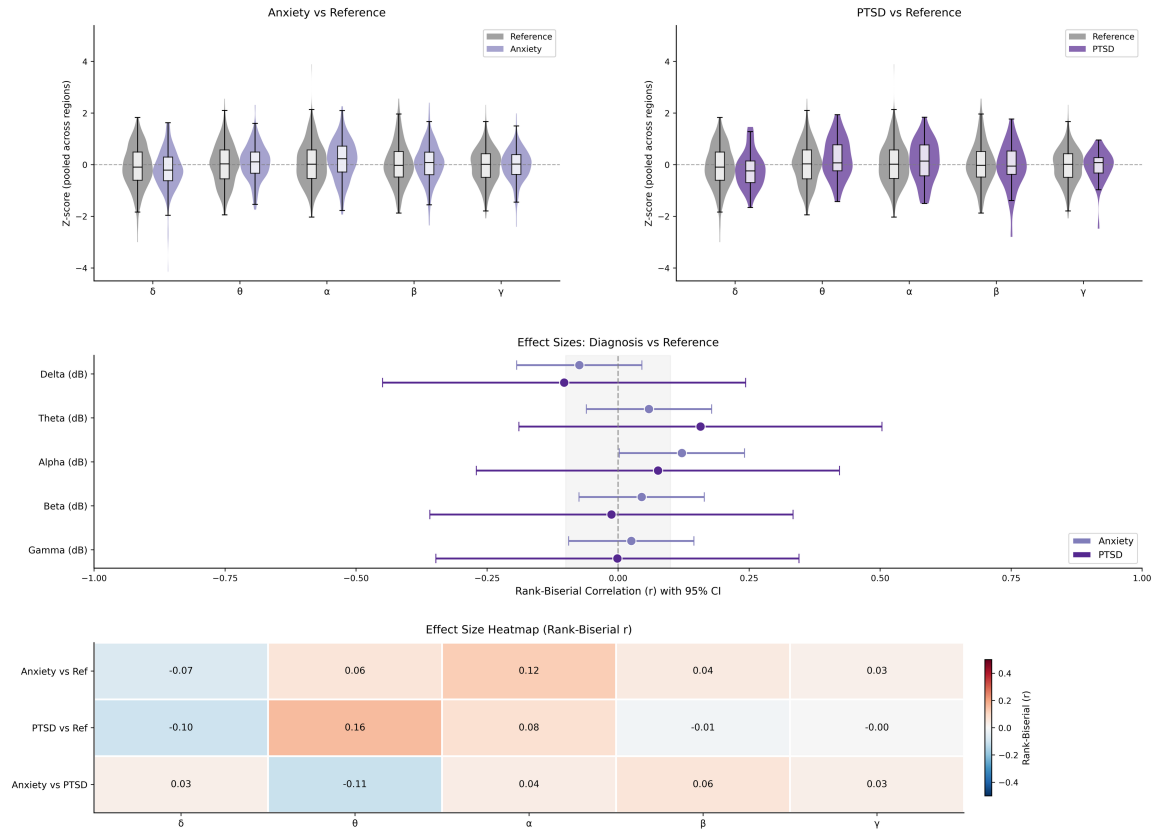

**Supplementary Figure S5.** Psychiatric cohort group comparisons. Z-score deviation profiles for anxiety (n=272) and PTSD (n=35) compared against the held-out normative reference, shown per spectral feature and cortical region. Box plots show the distribution of z-scores; significance markers indicate FDR-corrected comparisons (BH; \*  $q < 0.05$ , \*\*  $q < 0.01$ , \*\*\*  $q < 0.001$ ).

## Supplementary Figure S6: Feature-level deviation profiles per diagnosis

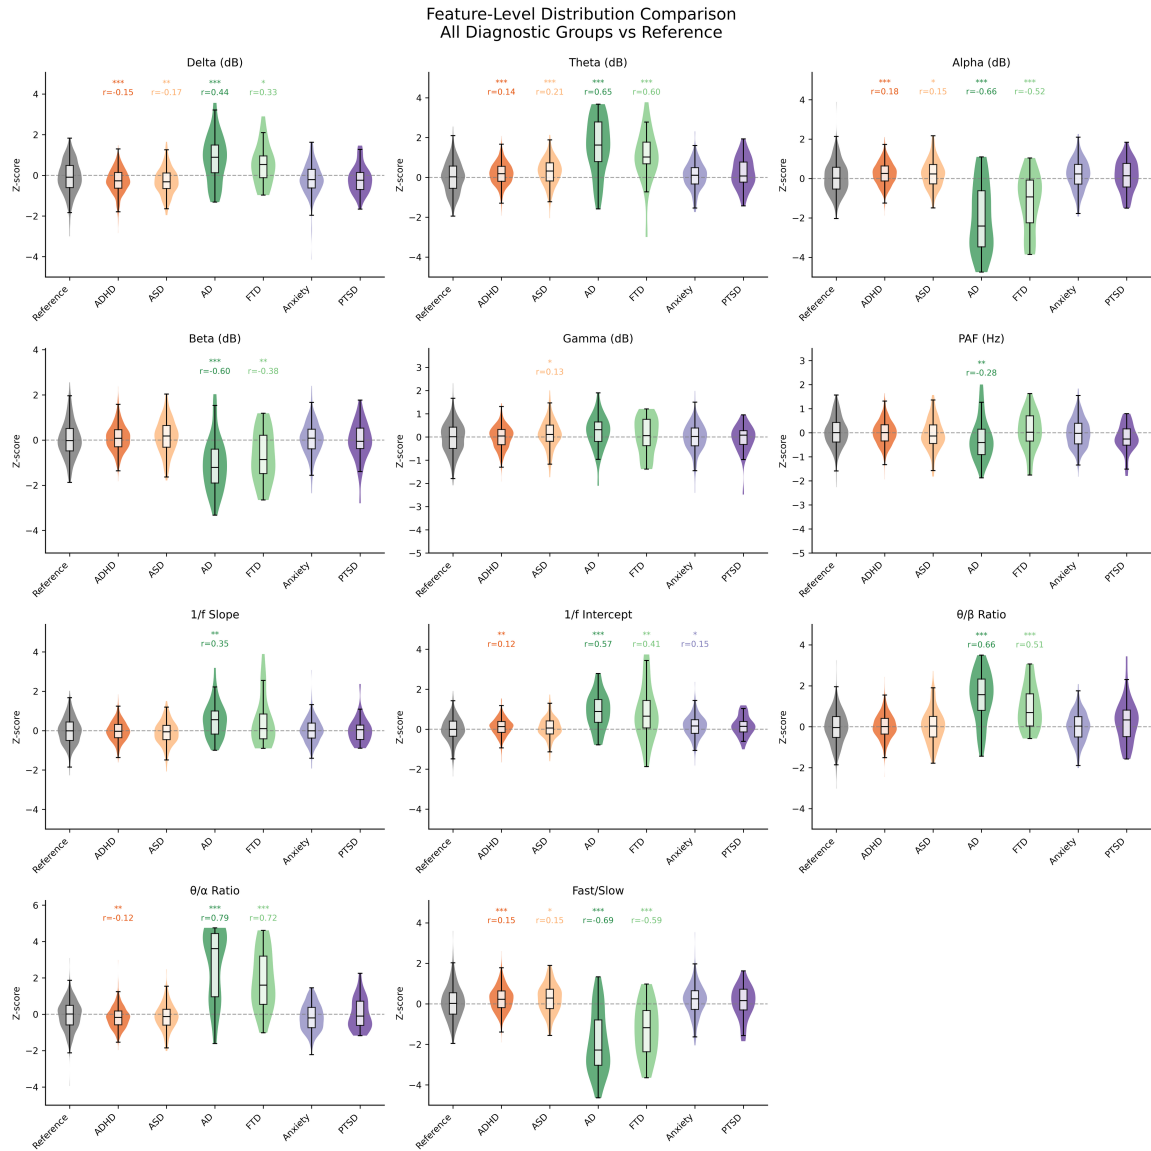

**Supplementary Figure S6.** Feature-level deviation profiles per diagnosis. Compact visualization of z-score deviations across all 11 spectral features for each diagnostic cohort, pooled across cortical regions. Each panel shows the deviation direction and magnitude relative to normative expectations, enabling direct visual comparison of spectral signatures across conditions.

# Supplementary Figure S7: Cross-category Comparisons

Cross-Category Diagnostic Comparison Summary  
Mann-Whitney U with BH-FDR Correction | Pooled Z-scores

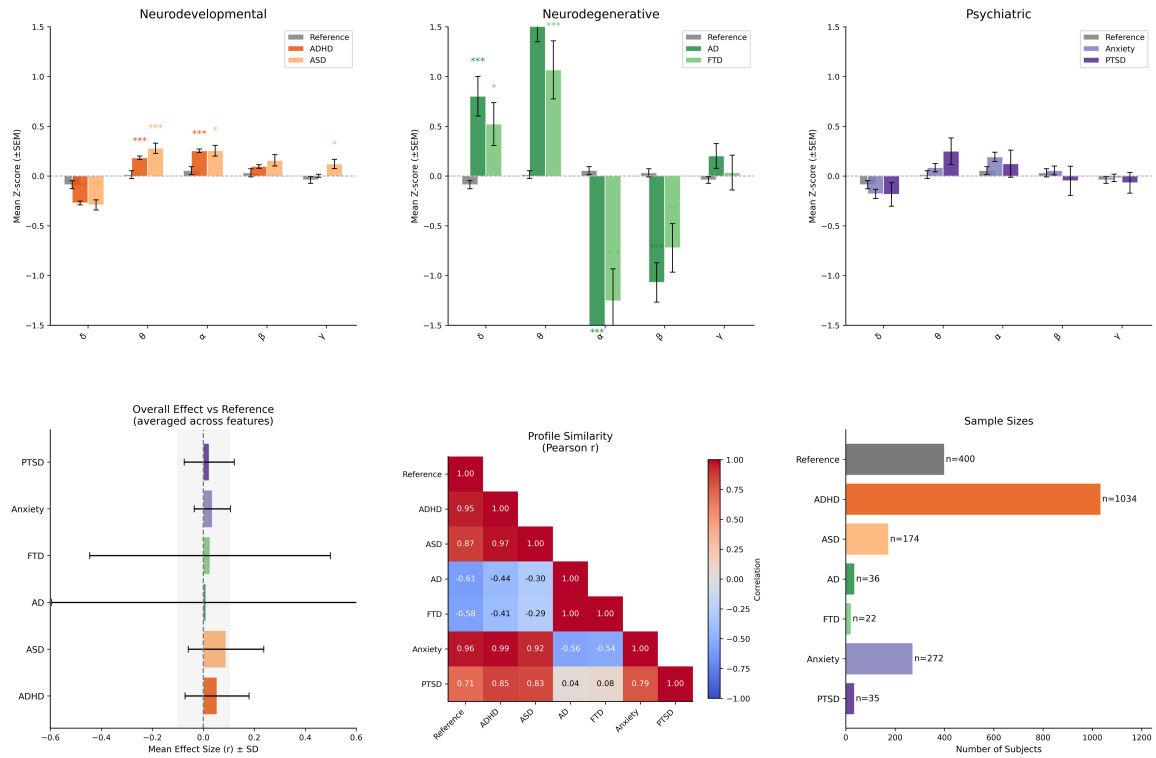

**Supplementary Figure S7.** Cross-category comparisons. Summary visualization comparing deviation profiles across all diagnostic categories simultaneously. Panels show (a) within-category pairwise comparisons (ADHD vs ASD, Alzheimer’s vs FTD, anxiety vs PTSD) and (b) cross-category overlap in the multivariate deviation space, illustrating the degree of spectral convergence and divergence across nosological boundaries.

## Supplementary Figure S8: Sex Effects on Normative Trajectories

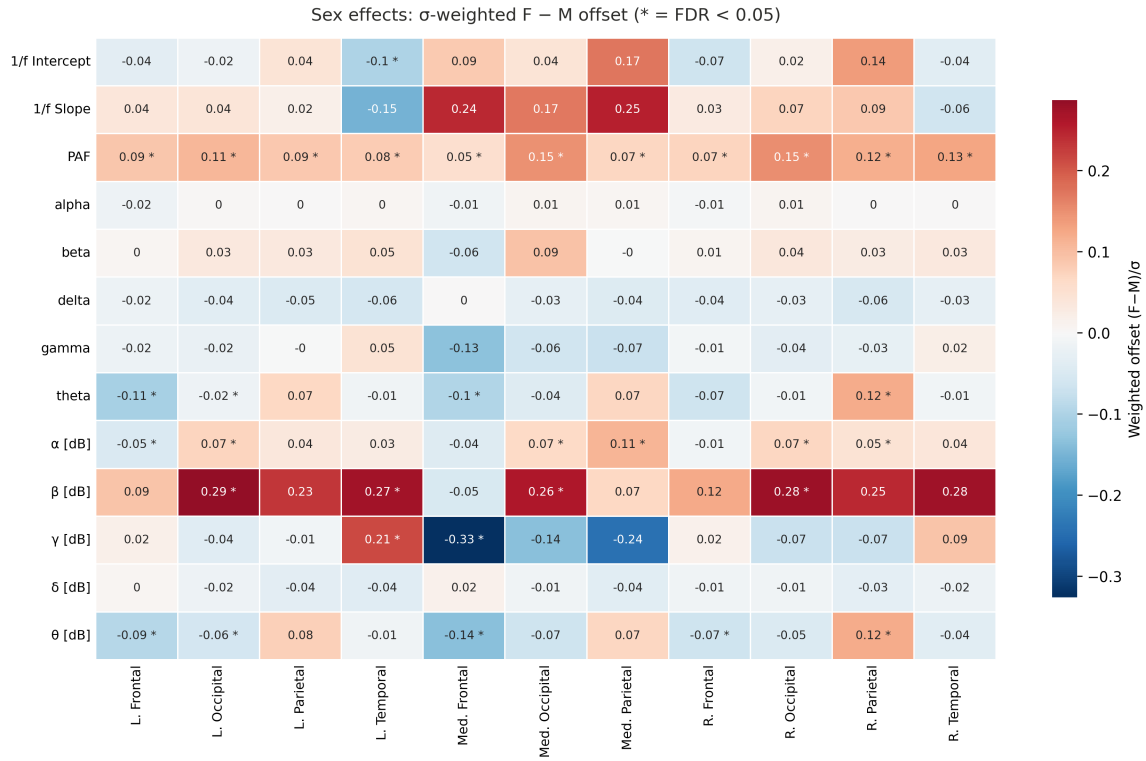

**Supplementary Figure S8.** Sex effects on normative lifespan trajectories. Heatmap of trajectory comparison metrics between female and male normative models across all feature–region combinations. Circular-shift permutation testing (2,000 permutations) on the absolute-area statistic was used to assess shape ( $q_{\text{shape}}$ ) and level ( $q_{\text{level}}$ ) differences, with FDR correction (Benjamini–Hochberg). No trajectory shape differences survived correction (0/143; min  $q = 0.55$ ). Small but significant level offsets were detected in 33/143 comparisons (23.1%; min  $q = 0.003$ ), though these were feature- and region-specific rather than globally consistent. Dispersion ( $\sigma$ ) trajectory comparisons showed no significant shape differences (0/143).

## Supplementary Figure S9: Hemispheric Lateralization

Lateralization:  $\sigma$ -weighted L – R offset (\* = FDR < 0.05)

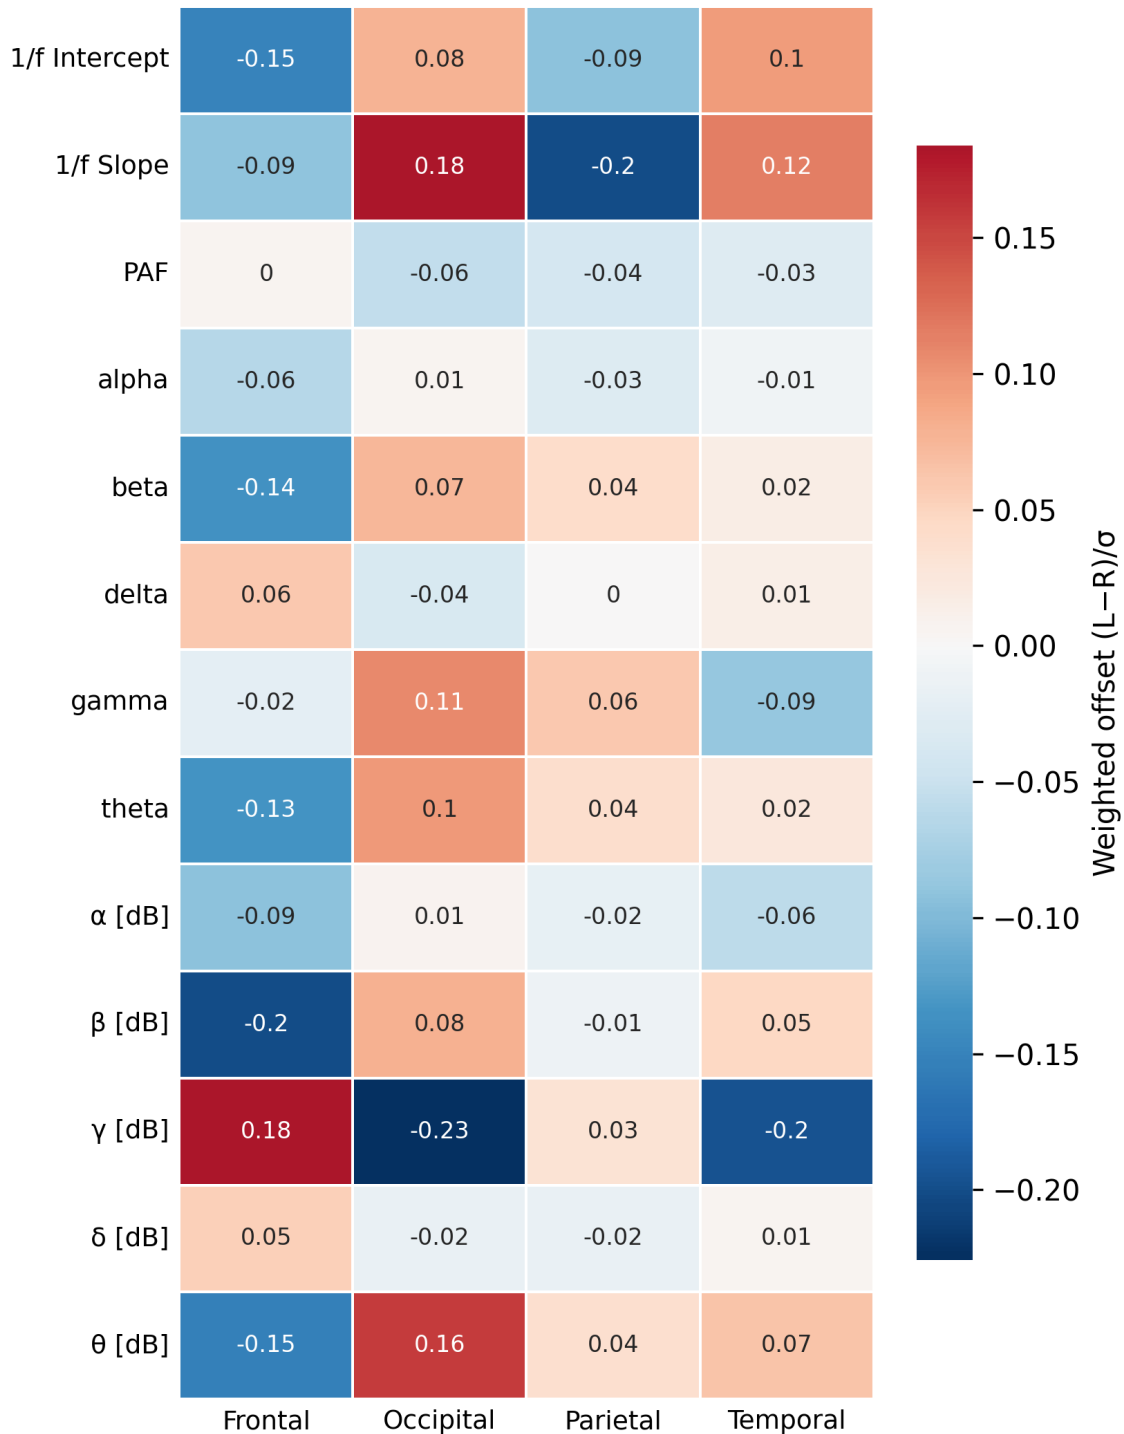

**Supplementary Figure S9.** Hemispheric lateralization of normative trajectories. Heatmap of left–right homologous trajectory comparisons across all feature–lobe–sex combinations. Permutation testing (2,000 permutations) on the absolute-area statistic between left and right hemispheric trajectories, FDR-corrected. No lateralization effects survived

multiple-comparison correction (0/104 comparisons; mean permutation  $p = 0.94$ ; all FDR-corrected  $q = 1.0$ ), indicating that normative spectral trajectories are bilaterally symmetric at the lobar aggregation level used in this study.

## Supplementary Figure S10: Intra-hemispheric Topological Comparisons

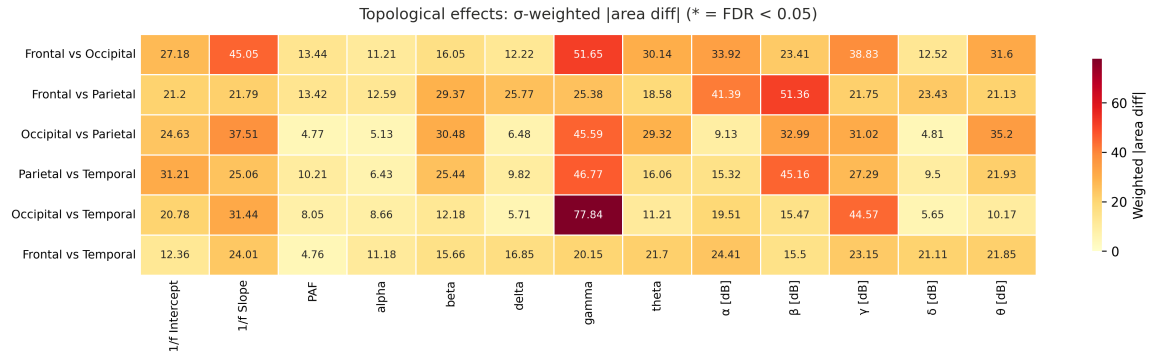

**Supplementary Figure S10.** Intra-hemispheric topological comparisons of normative trajectories. Heatmap of pairwise region–region trajectory comparisons within each hemisphere, across all feature–sex combinations. Curve-distance metrics (mean absolute difference, RMSE, absolute area between curves, maximum deviation) and permutation-based significance testing were used to quantify regional differences in spectral trajectory shape. After FDR correction, no intra-hemispheric region pairs showed significant trajectory shape differences, consistent with the spatially distributed nature of spectral dynamics at the lobar aggregation scale.

## Supplementary Data Files

**sex\_effects\_table.csv** – Full sex effects (143 comparisons) with permutation tests and FDR q-values.

**lateralization\_table.csv** – Left-right hemispheric comparisons with permutation tests.

**topology\_table.csv** – Intra-hemispheric region-pair comparisons.

**trajectory\_summary.csv** – Quantitative trajectory summary: slopes, turning points, inflection ages.

**all\_diagnoses\_stats\_globalFDR.csv** – Covariate-stratified z-score comparisons ( $\text{sex} \times \text{eyes} \times \text{diagnosis}$ ).

**statistical\_comparisons.csv** – Extended within-category statistical comparisons.
